# Supplementary material for: Ring opening at N1–C2 bond of azetidin-2-ones by a molybdenum hydroxo-carbonyl complex: evidence from a computational study
Source: Royal Society of Chemistry journal article supplement (doi:10.1039/b810868d), 2008-01-01
Supplement: b810868d.pdf [file b810868d.pdf]

## Supporting information

# Ring opening at N1-C2 bond of azetidin-2-ones by a molybdenum hydroxo-carbonyl complex: evidence from a computational study

Violeta Yeguas,<sup>a</sup> Natalia Díaz,<sup>a</sup> Pablo Campomanes,<sup>b</sup> and Ramón López\*<sup>a</sup>

<sup>a</sup> Departamento de Química Física y Analítica, Universidad de Oviedo, C/Julián Clavería, 8, 33006 Oviedo, Spain.

<sup>b</sup> Laboratory of Computational Chemistry and Biochemistry, École Polytechnique Fédérale de Lausanne (EPFL), CH-1015 Lausanne, Switzerland.

rlopez@uniovi.es

**Index**

|                       |             |
|-----------------------|-------------|
| <b>Table1S</b> .....  | <b>pS3</b>  |
| <b>Table2S</b> .....  | <b>pS4</b>  |
| <b>Table3S</b> .....  | <b>pS5</b>  |
| <b>Table4S</b> .....  | <b>pS5</b>  |
| <b>Figure1S</b> ..... | <b>pS38</b> |
| <b>Figure2S</b> ..... | <b>pS39</b> |

**Table 1S.** Absolute electronic energies (in hartree), Gibbs energies of solvation, relative electronic energies in gas phase, relative Gibbs energies of solvation, and relative energies in dichloromethane solution (in kcal/mol) at the B3LYP/6-31+G(d,p) (LANL2DZ for Mo by f polarization functions with exponent 1.043) level of theory for the critical structures located along the reaction mechanisms found for the reaction between azetidin-2-one and  $[\text{Mo}(\text{OH})(\eta^3\text{-C}_3\text{H}_5)(\text{CO})_2(\text{N}_2\text{C}_2\text{H}_4)]$ .

| Species                    | E           | $\Delta G_{\text{solv}}$ | $\Delta E$ | $\Delta\Delta G_{\text{solv}}$ | $\Delta E_{\text{sol}}$ |
|----------------------------|-------------|--------------------------|------------|--------------------------------|-------------------------|
| azetidin-2-one + <b>R</b>  | -922.846521 | -10.5                    | 0.0        | 0.0                            | 0.0                     |
| <b>TSA</b>                 | -922.785062 | -3.3                     | 38.6       | 7.2                            | 45.8                    |
| <b>TS1B</b>                | -922.802425 | -4.5                     | 27.7       | 6.0                            | 33.7                    |
| <b>M1B</b>                 | -922.828852 | -2.9                     | 11.1       | 7.6                            | 18.7                    |
| <b>TS2B</b>                | -922.789233 | -3.7                     | 35.9       | 6.8                            | 42.7                    |
| <b>TS1C</b>                | -922.779190 | -5.8                     | 42.3       | 4.7                            | 47.0                    |
| <b>M1C</b>                 | -922.829096 | -2.8                     | 10.9       | 7.7                            | 18.6                    |
| <b>TS2C</b>                | -922.823162 | -4.4                     | 14.7       | 6.1                            | 20.8                    |
| <b>M2C</b>                 | -922.824596 | -4.6                     | 13.8       | 5.9                            | 19.7                    |
| <b>TS3C</b>                | -922.819948 | -3.7                     | 16.7       | 6.8                            | 23.5                    |
| <b>M3C</b>                 | -922.828518 | -4.3                     | 11.3       | 6.2                            | 17.5                    |
| <b>TS4C</b>                | -922.790049 | -4.4                     | 35.4       | 6.1                            | 41.5                    |
| <b>P</b>                   | -922.888967 | -3.9                     | -26.6      | 6.6                            | -20.0                   |
| <b>TS-RR'</b>              | -675.531779 | -4.1                     | 4.4        | -0.1                           | 4.3                     |
| azetidin-2-one + <b>R'</b> | -922.844690 | -10.9                    | 1.2        | -0.4                           | 0.8                     |
| <b>TS'A</b>                | -922.782832 | -3.9                     | 40.0       | 6.7                            | 46.6                    |
| <b>TS1'B</b>               | -922.801075 | -4.9                     | 28.5       | 5.6                            | 34.1                    |
| <b>M1'B</b>                | -922.828959 | -3.3                     | 11.0       | 7.2                            | 18.2                    |
| <b>TS2'B</b>               | -922.794665 | -5.0                     | 32.5       | 5.5                            | 38.0                    |
| <b>TS1'C</b>               | -922.779116 | -5.4                     | 42.3       | 5.1                            | 47.4                    |
| <b>M1'C</b>                | -922.827506 | -3.8                     | 11.9       | 6.7                            | 18.6                    |
| <b>TS2'C</b>               | -922.819961 | -4.3                     | 16.7       | 6.2                            | 22.9                    |
| <b>M2'C</b>                | -922.820797 | -4.5                     | 16.1       | 6.0                            | 22.1                    |
| <b>TS3'C</b>               | -922.820290 | -2.7                     | 16.5       | 7.8                            | 24.3                    |
| <b>P'</b>                  | -922.887322 | -8.5                     | -25.6      | 2.0                            | -23.6                   |
| <b>TS-PP'</b>              | -922.883099 | -4.5                     | 3.7        | -0.5                           | 3.1                     |

**Table 2S.** Absolute electronic energies (in hartree), Gibbs energies of solvation, relative electronic energies in gas phase, relative Gibbs energies of solvation, and relative energies in dichloromethane solution (in kcal/mol) at the B3LYP/6-31+G(d,p) (LANL2DZ for Mo by f polarization function with exponent 1.043) level of theory for the critical structures located for the reaction of [Mo(OH)( $\eta^3$ -C<sub>3</sub>H<sub>5</sub>)(CO)<sub>2</sub>(N<sub>2</sub>C<sub>2</sub>H<sub>4</sub>)] toward *N*-sulfonate azetidin-2-one and 3-formylamine-*N*-sulfonate azetidin-2-one.

| Species                                                | E            | $\Delta G_{solv}$ | $\Delta E$ | $\Delta\Delta G_{solv}$ | $\Delta E_{sol}$ |
|--------------------------------------------------------|--------------|-------------------|------------|-------------------------|------------------|
| <i>N</i> -sulfonate azetidin-2-one                     |              |                   |            |                         |                  |
| + R                                                    | -1546.141580 | -51.4             | 0.0        | 0.0                     | 0.0              |
| TS1B-s                                                 | -1546.091236 | -44.8             | 31.6       | 6.6                     | 38.2             |
| M1B-s                                                  | -1546.114892 | -42.7             | 16.7       | 8.7                     | 25.4             |
| TS2B1-s                                                | -1546.099594 | -40.7             | 26.3       | 10.7                    | 37.0             |
| M2B1-s                                                 | -1546.154523 | -36.4             | -8.1       | 15.0                    | 6.9              |
| TS3B1-s                                                | -1546.123008 | -36.1             | 11.7       | 15.3                    | 27.0             |
| M2B2-s                                                 | -1546.102493 | -43.6             | 24.5       | 7.8                     | 32.3             |
| TS2B2-s                                                | -1546.066770 | -53.1             | 46.9       | -1.7                    | 45.2             |
| P-s                                                    | -1546.193559 | -37.0             | -32.6      | 14.4                    | -18.2            |
| TS1'B-s                                                | -1546.114502 | -39.6             | 17.0       | 11.8                    | 28.8             |
| M1'B-s                                                 | -1546.134222 | -37.3             | 4.6        | 14.1                    | 18.7             |
| TS2'B1-s                                               | -1546.124955 | -39.9             | 10.4       | 11.5                    | 21.9             |
| M2'B1-s                                                | -1546.161988 | -35.6             | -12.8      | 15.8                    | 3.0              |
| TS3'B1-s                                               | -1546.130640 | -33.8             | 6.8        | 17.6                    | 24.4             |
| TS2'B2-s                                               | -1546.129598 | -36.5             | 7.5        | 14.9                    | 22.4             |
| M2'B2-s                                                | -1546.131733 | -37.4             | 6.2        | 14.0                    | 20.2             |
| TS3'B2-s                                               | -1546.115077 | -39.4             | 16.6       | 12.0                    | 28.6             |
| P'-s                                                   | -1546.195853 | -37.5             | -34.1      | 13.9                    | -20.2            |
| 3-formylamine- <i>N</i> -sulfonate azetidin-2-one + R' |              |                   |            |                         |                  |
| TS1'B-sf                                               | -1714.829473 | -35.9             | 12.8       | 13.3                    | 26.1             |
| M1'B-sf                                                | -1714.847456 | -35.1             | 1.5        | 14.1                    | 15.6             |
| TS2'B1-sf                                              | -1714.834656 | -37.2             | 9.5        | 12.0                    | 21.5             |
| M2'B1-sf                                               | -1714.867853 | -34.2             | -11.3      | 15.0                    | 3.7              |
| TS3'B1-sf                                              | -1714.839976 | -31.5             | 6.2        | 17.7                    | 23.9             |
| TS2'B2-sf                                              | -1714.842450 | -34.2             | 4.6        | 15.0                    | 19.6             |
| M2'B2-sf                                               | -1714.843562 | -35.1             | 3.9        | 14.1                    | 18.0             |
| TS3'B2-sf                                              | -1714.822038 | -37.8             | 17.4       | 11.4                    | 28.8             |
| P'-sf                                                  | -1714.901213 | -35.9             | -32.3      | 13.3                    | -19.0            |

**Table 3S.** Imaginary vibrational frequencies corresponding to all the located transition states.

| Species | $\omega_i$ (cm <sup>-1</sup> ) | Species   | $\omega_i$ (cm <sup>-1</sup> ) |
|---------|--------------------------------|-----------|--------------------------------|
| TSA     | 1400                           | TS1B-s    | 76                             |
| TS1B    | 106                            | TS2B1-s   | 289                            |
| TS2B    | 1027                           | TS3B1-s   | 1661                           |
| TS1C    | 1579                           | TS2B2-s   | 284                            |
| TS2C    | 311                            | TS1'B-s   | 102                            |
| TS3C    | 450                            | TS2'B1-s  | 269                            |
| TS4C    | 413                            | TS3'B1-s  | 1640                           |
| TS'A    | 839                            | TS2'B2-s  | 131                            |
| TS1'B   | 107                            | TS3'B2-s  | 178                            |
| TS2'B   | 412                            | TS1'B-sf  | 94                             |
| TS1'C   | 1556                           | TS2'B1-sf | 687                            |
| TS2'C   | 287                            | TS3'B1-sf | 1652                           |
| TS3'C   | 461                            | TS2'B2-sf | 84                             |
| TS-RR'  | 99                             | TS3'B2-sf | 219                            |
| TS-PP'  | 28                             |           |                                |

**Table 4S.** Cartesian coordinates, in angstroms, corresponding to all the located structures.

[Mo(OH)( $\eta^3$ -C<sub>3</sub>H<sub>5</sub>)(CO)<sub>2</sub>(N<sub>2</sub>C<sub>2</sub>H<sub>4</sub>)] (**R**)

|    |           |           |           |
|----|-----------|-----------|-----------|
| C  | 0.061743  | -0.102850 | -2.101039 |
| Mo | 0.058341  | -0.086825 | -0.096779 |
| O  | 2.094772  | -0.077144 | -0.192003 |
| O  | 0.104811  | -0.100966 | -3.261463 |
| C  | 0.156694  | -2.081298 | -0.269147 |
| O  | 0.255162  | -3.234783 | -0.359829 |
| N  | 0.424883  | 2.048032  | 0.295236  |
| C  | 0.972584  | 2.359937  | 1.435491  |
| C  | 1.023511  | 1.301696  | 2.415350  |
| N  | 0.515642  | 0.161426  | 2.042133  |
| C  | -2.080258 | 0.746424  | -0.866510 |
| C  | -2.170053 | 0.340606  | 0.480373  |
| C  | -1.995073 | -1.026563 | 0.775441  |
| H  | 2.504152  | -0.659843 | -0.842525 |
| H  | 0.574464  | -0.572177 | 2.745920  |
| H  | 1.449100  | 1.471025  | 3.403561  |
| H  | 1.358482  | 3.353262  | 1.660762  |
| H  | 0.411848  | 2.807276  | -0.383240 |
| H  | -2.169812 | 1.078859  | 1.277528  |
| H  | -2.451226 | 0.078387  | -1.638730 |
| H  | -2.101962 | 1.803874  | -1.113459 |
| H  | -2.362705 | -1.764429 | 0.067900  |
| H  | -1.950217 | -1.353211 | 1.810304  |

[Mo(OH)( $\eta^3$ -C<sub>3</sub>H<sub>5</sub>)(CO)<sub>2</sub>(N<sub>2</sub>C<sub>2</sub>H<sub>4</sub>)] (R')

|    |           |           |           |
|----|-----------|-----------|-----------|
| C  | -0.000256 | 0.001486  | 0.007713  |
| Mo | 0.005396  | 0.002908  | 2.042125  |
| N  | 0.528114  | 0.003299  | 4.135472  |
| C  | 1.468514  | 0.825269  | 4.555358  |
| C  | 1.922434  | 1.761830  | 3.579840  |
| N  | 1.333364  | 1.664206  | 2.405215  |
| O  | 0.052964  | 0.003933  | -1.147173 |
| C  | -2.255344 | 0.192896  | 2.941442  |
| C  | -1.760821 | 1.471315  | 2.627987  |
| C  | -1.484142 | 1.781501  | 1.284718  |
| O  | 1.659298  | -1.122781 | 1.731803  |
| C  | -0.885403 | -1.821142 | 1.907438  |
| O  | -1.347628 | -2.879712 | 1.858497  |
| H  | 2.382656  | -0.862397 | 2.319403  |
| H  | 0.228820  | -0.676014 | 4.832304  |
| H  | 1.865915  | 0.804572  | 5.568046  |
| H  | 2.688569  | 2.502481  | 3.799761  |
| H  | 1.681602  | 2.321538  | 1.710043  |
| H  | -1.390879 | 2.117645  | 3.419966  |
| H  | -2.115823 | 1.354055  | 0.510748  |
| H  | -1.001226 | 2.720815  | 1.033720  |
| H  | -2.917608 | -0.297439 | 2.233106  |
| H  | -2.372242 | -0.103554 | 3.979211  |

TS-RR'

|    |           |           |           |
|----|-----------|-----------|-----------|
| C  | 0.001006  | -0.026445 | 0.034341  |
| Mo | -0.013267 | 0.019689  | 2.055773  |
| O  | 2.035768  | 0.058830  | 1.834951  |
| O  | 0.048281  | -0.024686 | -1.123483 |
| C  | 0.370553  | -1.980422 | 1.946655  |
| O  | 0.636289  | -3.103628 | 1.900089  |
| N  | 0.126861  | 2.136745  | 2.357253  |
| C  | 0.650310  | 2.555156  | 3.494843  |
| C  | 0.811995  | 1.552586  | 4.493862  |
| N  | 0.418431  | 0.345767  | 4.147338  |
| C  | -2.217407 | 0.550114  | 1.289325  |
| C  | -2.279924 | 0.164004  | 2.645592  |
| C  | -1.928914 | -1.160900 | 2.958780  |
| H  | 2.371967  | 0.764333  | 1.269233  |
| H  | 0.548299  | -0.358413 | 4.870445  |
| H  | 1.202328  | 1.786677  | 5.482328  |
| H  | 0.903070  | 3.597313  | 3.678497  |
| H  | 0.004287  | 2.871111  | 1.663226  |
| H  | -2.374035 | 0.911185  | 3.428173  |
| H  | -2.499829 | -0.178036 | 0.533437  |
| H  | -2.373985 | 1.589760  | 1.017468  |
| H  | -2.179945 | -1.947448 | 2.252461  |
| H  | -1.835220 | -1.468994 | 3.995549  |

Azetidin-2-one

|   |           |           |           |
|---|-----------|-----------|-----------|
| C | 0.011894  | -0.033857 | -0.073855 |
| C | -0.033922 | 0.073244  | 1.479318  |
| C | 1.545639  | 0.110456  | 0.074683  |
| N | 1.431866  | 0.198766  | 1.442122  |
| H | 2.131252  | 0.309935  | 2.165185  |
| O | 2.496709  | 0.139645  | -0.675394 |
| H | -0.461180 | 0.785811  | -0.619218 |
| H | -0.306313 | -0.991591 | -0.491655 |
| H | -0.545217 | 0.958418  | 1.870451  |
| H | -0.389494 | -0.822816 | 1.997616  |

TSA

|   |           |           |          |
|---|-----------|-----------|----------|
| C | 0.255610  | -1.534915 | 1.274170 |
| O | -0.082648 | -2.344237 | 2.030570 |

Supplementary Material (ESI) for *Dalton Transactions*  
This journal is © The Royal Society of Chemistry 2008

|    |           |           |           |
|----|-----------|-----------|-----------|
| Mo | 0.819671  | -0.122685 | -0.046322 |
| O  | -1.251324 | -0.070006 | -0.576542 |
| C  | -2.399328 | 0.382943  | 0.334247  |
| N  | -3.066201 | -1.237438 | 0.052288  |
| C  | -4.186133 | -0.570679 | -0.650079 |
| C  | -3.581879 | 0.849409  | -0.565580 |
| N  | 1.015258  | 1.612052  | -1.390854 |
| C  | 0.691782  | 2.787689  | -0.926148 |
| C  | 0.286061  | 2.818653  | 0.454700  |
| N  | 0.333184  | 1.673170  | 1.074253  |
| C  | 3.104784  | -0.426534 | -0.717894 |
| C  | 3.019526  | 0.293181  | 0.489616  |
| C  | 2.497632  | -0.394687 | 1.611103  |
| C  | 0.894343  | -1.625897 | -1.378440 |
| O  | 0.903916  | -2.472168 | -2.172380 |
| O  | -2.126876 | 0.845087  | 1.448888  |
| H  | 1.253810  | 1.604000  | -2.380775 |
| H  | 0.696919  | 3.688875  | -1.538215 |
| H  | -0.094289 | 3.726773  | 0.918263  |
| H  | -0.109566 | 1.666640  | 1.991517  |
| H  | 3.168187  | 1.368815  | 0.512693  |
| H  | 2.743330  | -1.446409 | 1.732652  |
| H  | 2.305707  | 0.147160  | 2.532244  |
| H  | 3.339296  | -1.486454 | -0.679501 |
| H  | 3.386466  | 0.081162  | -1.635357 |
| H  | -1.893715 | -1.049923 | -0.556955 |
| H  | -3.305183 | -1.868478 | 0.813444  |
| H  | -4.205067 | 1.574175  | -0.035135 |
| H  | -3.250971 | 1.274147  | -1.517160 |
| H  | -5.126761 | -0.652723 | -0.095602 |
| H  | -4.349134 | -0.953564 | -1.664424 |

**TS1B**

|    |           |           |           |
|----|-----------|-----------|-----------|
| Mo | -0.769412 | -0.134374 | 0.015997  |
| C  | -2.935760 | -0.543536 | 0.863228  |
| C  | -2.984760 | 0.112169  | -0.395000 |
| C  | -2.529526 | -0.601824 | -1.519316 |
| N  | -1.073894 | 1.698515  | 1.256573  |
| C  | -0.930078 | 2.865932  | 0.704802  |
| C  | -0.540315 | 2.843171  | -0.688841 |
| N  | -0.470785 | 1.658558  | -1.215903 |
| C  | -0.714153 | -1.589443 | 1.376209  |
| O  | -0.653142 | -2.404434 | 2.204471  |
| C  | -0.178544 | -1.586782 | -1.250968 |
| O  | 0.144182  | -2.427460 | -1.977568 |
| O  | 1.606632  | 0.148767  | -1.156525 |
| C  | 2.310460  | 0.141714  | -0.055356 |
| N  | 3.182460  | -1.027275 | 0.269522  |
| C  | 4.409065  | -0.191366 | 0.141333  |
| C  | 3.544169  | 1.092302  | 0.107383  |
| O  | 1.326390  | 0.279690  | 1.094139  |
| H  | -3.158333 | -1.606683 | 0.897875  |
| H  | -3.202907 | 0.004607  | 1.761899  |
| H  | -3.206963 | 1.173387  | -0.462007 |
| H  | -2.694384 | -1.674578 | -1.565451 |
| H  | -2.440274 | -0.101857 | -2.478669 |
| H  | -1.269451 | 1.726980  | 2.255682  |
| H  | -1.028574 | 3.802790  | 1.252495  |
| H  | -0.241418 | 3.751512  | -1.209972 |
| H  | -0.031473 | 1.609989  | -2.133318 |
| H  | 3.090836  | -1.777824 | -0.411750 |
| H  | 5.095502  | -0.297795 | 0.987946  |
| H  | 4.963283  | -0.359250 | -0.789845 |
| H  | 3.549358  | 1.671711  | 1.034213  |
| H  | 3.693822  | 1.750255  | -0.750858 |
| H  | 1.635970  | -0.364634 | 1.751571  |

**M1B**

|    |           |           |           |
|----|-----------|-----------|-----------|
| C  | 0.149351  | -0.325552 | -0.177040 |
| C  | 0.055284  | 0.115094  | 1.157317  |
| C  | 1.255261  | 0.282048  | 1.880651  |
| Mo | 0.944129  | -2.034994 | 1.334569  |
| N  | -1.132038 | -2.741261 | 1.158740  |
| C  | -1.755688 | -3.058139 | 2.260027  |
| C  | -1.104667 | -2.657381 | 3.480614  |
| N  | 0.038098  | -2.042980 | 3.335345  |
| C  | 1.614622  | -2.426087 | -0.534791 |
| O  | 1.952682  | -2.630948 | -1.621548 |
| C  | 2.884132  | -1.723602 | 1.748233  |
| O  | 3.999800  | -1.538040 | 2.006387  |
| H  | -0.751915 | -0.578540 | -0.727463 |
| H  | 0.985917  | 0.013923  | -0.781239 |
| H  | -0.903075 | 0.126146  | 1.668619  |
| H  | 2.130631  | 0.654542  | 1.355941  |
| H  | 1.216046  | 0.516646  | 2.940447  |
| H  | -1.608721 | -3.037270 | 0.308798  |
| H  | -2.717319 | -3.569333 | 2.275671  |
| H  | -1.564626 | -2.838969 | 4.451035  |
| H  | 0.471672  | -1.758324 | 4.211850  |
| O  | 1.207967  | -4.023884 | 1.794185  |
| C  | 2.250873  | -4.893803 | 1.690046  |
| O  | 3.103419  | -4.517804 | 0.624375  |
| H  | 3.985180  | -4.840865 | 0.856117  |
| N  | 3.025092  | -5.133518 | 2.942227  |
| C  | 2.285395  | -6.397692 | 3.199177  |
| C  | 1.784232  | -6.386974 | 1.735744  |
| H  | 2.918760  | -4.399015 | 3.638680  |
| H  | 1.468251  | -6.299053 | 3.925682  |
| H  | 2.932195  | -7.228874 | 3.499447  |
| H  | 0.714589  | -6.530622 | 1.575140  |
| H  | 2.359436  | -7.031841 | 1.066518  |

**TS2B**

|    |           |           |           |
|----|-----------|-----------|-----------|
| C  | 0.804514  | -1.540242 | 1.491784  |
| O  | 0.743697  | -2.323196 | 2.343125  |
| Mo | 0.850711  | -0.136779 | 0.045712  |
| O  | -1.115505 | 0.296254  | 0.760985  |
| C  | -2.202381 | 0.448661  | 0.102422  |
| C  | -3.473146 | 0.865735  | 0.865973  |
| C  | -4.381355 | -0.313477 | 0.452971  |
| N  | -3.464523 | -0.998958 | -0.468708 |
| N  | 0.464565  | 1.623347  | -1.174209 |
| C  | 0.548943  | 2.796966  | -0.615329 |
| C  | 1.092301  | 2.809711  | 0.719529  |
| N  | 1.382968  | 1.638987  | 1.218270  |
| C  | 2.343902  | -0.706158 | -1.703420 |
| C  | 3.045843  | -0.076870 | -0.651338 |
| C  | 3.102086  | -0.762092 | 0.579541  |
| C  | 0.000093  | -1.565007 | -1.097749 |
| O  | -0.471510 | -2.394307 | -1.751504 |
| O  | -2.155041 | 0.765482  | -1.219959 |
| H  | -0.051242 | 1.605372  | -2.052421 |
| H  | 0.194324  | 3.708138  | -1.093866 |
| H  | 1.226408  | 3.739634  | 1.270223  |
| H  | 1.726114  | 1.667589  | 2.176876  |
| H  | 3.352429  | 0.962181  | -0.728574 |
| H  | 3.171675  | -1.846168 | 0.570396  |
| H  | 3.524774  | -0.274738 | 1.453115  |
| H  | 2.408049  | -1.786955 | -1.795389 |
| H  | 2.167515  | -0.169562 | -2.630546 |
| H  | -2.882232 | -0.021813 | -1.428120 |



Supplementary Material (ESI) for *Dalton Transactions*  
This journal is © The Royal Society of Chemistry 2008

|   |           |           |           |
|---|-----------|-----------|-----------|
| H | -3.500542 | -2.015451 | -0.413749 |
| H | -3.272730 | 0.904459  | 1.940117  |
| H | -3.809235 | 1.853449  | 0.529020  |
| H | -4.630478 | -0.920900 | 1.333529  |
| H | -5.334055 | -0.002048 | -0.005986 |

**TS1C**

|    |           |           |           |
|----|-----------|-----------|-----------|
| C  | 0.000000  | 0.000000  | 0.000000  |
| O  | 0.000000  | 0.000000  | 1.156935  |
| Mo | 0.045640  | 0.000000  | -2.018842 |
| C  | -1.144892 | -1.911746 | -1.245377 |
| C  | -1.426751 | -1.677878 | -2.611153 |
| C  | -2.127257 | -0.499641 | -2.929825 |
| O  | 1.626720  | 1.392849  | -1.739922 |
| C  | 3.066588  | 1.296074  | -1.330691 |
| N  | 3.495254  | -0.023939 | -0.805905 |
| C  | 4.713773  | 0.000519  | -1.665744 |
| C  | 4.131885  | 1.193259  | -2.461579 |
| C  | -1.098856 | 1.656028  | -1.891821 |
| O  | -1.720663 | 2.632101  | -1.842396 |
| N  | 0.540126  | 0.028340  | -4.160179 |
| C  | 1.482945  | -0.766092 | -4.593528 |
| C  | 2.105959  | -1.582774 | -3.587925 |
| N  | 1.619975  | -1.445555 | -2.382347 |
| O  | 3.040676  | 2.342110  | -0.494262 |
| H  | 3.662444  | 0.016637  | 0.198424  |
| H  | 1.807206  | 2.249010  | -0.955666 |
| H  | 0.146742  | 0.639342  | -4.873662 |
| H  | 1.805714  | -0.792578 | -5.633315 |
| H  | 2.957526  | -2.221160 | -3.815124 |
| H  | 2.161675  | -1.894534 | -1.645532 |
| H  | -2.270604 | -0.214743 | -3.967558 |
| H  | -2.879881 | -0.135440 | -2.236074 |
| H  | -0.960682 | -2.277497 | -3.387929 |
| H  | -0.514443 | -2.748966 | -0.961855 |
| H  | -1.886805 | -1.617334 | -0.507569 |
| H  | 4.760875  | 2.081131  | -2.540283 |
| H  | 3.722846  | 0.931311  | -3.439798 |
| H  | 4.875982  | -0.932159 | -2.220663 |
| H  | 5.631228  | 0.249170  | -1.120903 |

**M1C**

|    |           |           |           |
|----|-----------|-----------|-----------|
| C  | 0.000000  | 0.000000  | 0.000000  |
| Mo | 0.000000  | 0.000000  | 2.006268  |
| O  | 2.107677  | 0.000000  | 2.030750  |
| C  | 2.947150  | 0.352477  | 1.035442  |
| O  | 3.049059  | -0.662836 | 0.023849  |
| O  | -0.033801 | 0.017290  | -1.159869 |
| C  | 0.170673  | -1.992516 | 1.813190  |
| O  | 0.324004  | -3.137422 | 1.704458  |
| N  | 0.350969  | 0.244863  | 4.157432  |
| C  | 0.836993  | 1.388509  | 4.552825  |
| C  | 0.902632  | 2.423768  | 3.549894  |
| N  | 0.422098  | 2.115435  | 2.380921  |
| C  | -2.041071 | -1.026606 | 2.757944  |
| C  | -2.217596 | 0.357647  | 2.552262  |
| C  | -2.085404 | 0.833834  | 1.228812  |
| C  | 4.348882  | 0.883066  | 1.480492  |
| C  | 4.131532  | 2.035099  | 0.473543  |
| N  | 2.696655  | 1.648329  | 0.333662  |
| H  | 2.395147  | 1.508863  | -0.629504 |

Supplementary Material (ESI) for *Dalton Transactions*  
This journal is © The Royal Society of Chemistry 2008

|   |           |           |           |
|---|-----------|-----------|-----------|
| H | 2.986258  | -1.512155 | 0.483511  |
| H | 0.333816  | -0.473495 | 4.879197  |
| H | 1.175242  | 1.570006  | 5.572254  |
| H | 1.348749  | 3.392475  | 3.771750  |
| H | 0.586541  | 2.812062  | 1.656158  |
| H | -2.015937 | -1.425399 | 3.767885  |
| H | -2.383553 | -1.716422 | 1.991743  |
| H | -2.256264 | 1.046755  | 3.390581  |
| H | -2.094726 | 1.902915  | 1.039264  |
| H | -2.454690 | 0.214233  | 0.416390  |
| H | 5.183495  | 0.208695  | 1.279902  |
| H | 4.353980  | 1.196191  | 2.526897  |
| H | 4.272862  | 3.054088  | 0.851066  |
| H | 4.712031  | 1.913659  | -0.448579 |

**TS2C**

|    |           |           |           |
|----|-----------|-----------|-----------|
| C  | 0.000000  | 0.000000  | 0.000000  |
| O  | 0.000000  | 0.000000  | 1.161190  |
| Mo | 0.029730  | 0.000000  | -2.002232 |
| C  | 1.090669  | -1.996335 | -1.213415 |
| C  | 0.662602  | -2.171542 | -2.547215 |
| C  | -0.724231 | -2.152638 | -2.795888 |
| O  | -0.158209 | 2.054551  | -1.999655 |
| C  | -0.571504 | 2.917782  | -1.049922 |
| N  | 0.431060  | 3.246001  | 0.008483  |
| C  | 0.121491  | 4.694440  | -0.100258 |
| C  | -0.603865 | 4.427150  | -1.440687 |
| C  | -1.982515 | -0.099134 | -1.839107 |
| O  | -3.136666 | -0.167751 | -1.783425 |
| N  | 0.235132  | 0.419415  | -4.150137 |
| C  | 1.322404  | 1.028245  | -4.534795 |
| C  | 2.373277  | 1.116523  | -3.550167 |
| N  | 2.114542  | 0.572411  | -2.395727 |
| O  | -1.806947 | 2.459255  | -0.461302 |
| H  | 0.225197  | 2.820505  | 0.909799  |
| H  | -2.460209 | 3.168190  | -0.466866 |
| H  | -0.492070 | 0.375161  | -4.861784 |
| H  | 1.455945  | 1.433930  | -5.536841 |
| H  | 3.320963  | 1.600953  | -3.781997 |
| H  | 2.859111  | 0.671147  | -1.708093 |
| H  | -1.090654 | -2.167071 | -3.818257 |
| H  | -1.394271 | -2.575835 | -2.052848 |
| H  | 1.373407  | -2.119106 | -3.366936 |
| H  | 2.150270  | -1.895957 | -0.997404 |
| H  | 0.494006  | -2.430259 | -0.415982 |
| H  | -1.590610 | 4.879713  | -1.583936 |
| H  | 0.013723  | 4.614588  | -2.320940 |
| H  | 1.010036  | 5.333669  | -0.139669 |
| H  | -0.552212 | 5.076639  | 0.679675  |

**M2C**

|    |           |           |           |
|----|-----------|-----------|-----------|
| C  | 0.000000  | 0.000000  | 0.000000  |
| O  | 0.000000  | 0.000000  | 1.162225  |
| Mo | 0.018850  | 0.000000  | -1.999154 |
| C  | 0.135034  | -2.264280 | -1.233544 |
| C  | -0.336413 | -2.227799 | -2.563894 |
| C  | -1.585338 | -1.618601 | -2.797277 |
| O  | 0.736270  | 1.937504  | -1.977729 |
| C  | 0.739107  | 2.884056  | -1.021461 |
| N  | 1.753934  | 2.736743  | 0.064776  |
| C  | 2.145512  | 4.163247  | -0.042102 |

Supplementary Material (ESI) for *Dalton Transactions*  
This journal is © The Royal Society of Chemistry 2008

|   |           |           |           |
|---|-----------|-----------|-----------|
| C | 1.399274  | 4.249867  | -1.396231 |
| C | -1.845951 | 0.761542  | -1.813189 |
| O | -2.921388 | 1.181253  | -1.739536 |
| N | 0.364204  | 0.325969  | -4.146315 |
| C | 1.603737  | 0.418056  | -4.539800 |
| C | 2.599848  | 0.026633  | -3.571816 |
| N | 2.143707  | -0.372446 | -2.419239 |
| O | -0.599683 | 3.020566  | -0.512923 |
| H | 1.408231  | 2.406369  | 0.963222  |
| H | -0.617181 | 3.699927  | 0.174696  |
| H | -0.318070 | 0.615123  | -4.844984 |
| H | 1.889774  | 0.749136  | -5.537333 |
| H | 3.661273  | 0.057612  | -3.814661 |
| H | 2.865211  | -0.620327 | -1.744736 |
| H | -1.930454 | -1.464960 | -3.815582 |
| H | -2.366364 | -1.724618 | -2.049684 |
| H | 0.323125  | -2.474707 | -3.390899 |
| H | 1.138140  | -2.626500 | -1.028285 |
| H | -0.583759 | -2.411564 | -0.432373 |
| H | 0.708961  | 5.084552  | -1.540536 |
| H | 2.052505  | 4.150033  | -2.265258 |
| H | 3.229120  | 4.322728  | -0.063557 |
| H | 1.715575  | 4.820284  | 0.729374  |

**TS3C**

|    |           |           |           |
|----|-----------|-----------|-----------|
| C  | 0.000000  | 0.000000  | 0.000000  |
| O  | 0.000000  | 0.000000  | 1.163564  |
| Mo | 0.040220  | 0.000000  | -1.995434 |
| C  | -2.223823 | 0.023212  | -2.842618 |
| C  | -1.801183 | -1.297230 | -2.593662 |
| C  | -1.530573 | -1.659131 | -1.256130 |
| O  | 1.929403  | 0.802317  | -1.922567 |
| C  | 2.564645  | 1.592602  | -1.014372 |
| O  | 1.712872  | 2.709751  | -0.729727 |
| C  | 4.040313  | 1.958937  | -1.412541 |
| C  | 4.507574  | 1.271149  | -0.097388 |
| N  | 3.111862  | 0.970187  | 0.181436  |
| C  | -0.730928 | 1.864034  | -1.807095 |
| O  | -1.214098 | 2.912321  | -1.736292 |
| N  | 1.225695  | -1.800392 | -2.431192 |
| C  | 1.839490  | -1.849177 | -3.579645 |
| C  | 1.465036  | -0.834145 | -4.534247 |
| N  | 0.547013  | 0.002610  | -4.139615 |
| H  | 2.657751  | 0.566344  | 0.987359  |
| H  | 2.034710  | 3.118311  | 0.084790  |
| H  | 5.152137  | 0.391742  | -0.242788 |
| H  | 4.998526  | 1.942995  | 0.622813  |
| H  | 4.361027  | 1.467685  | -2.332748 |
| H  | 4.228299  | 3.033606  | -1.470404 |
| H  | 1.510200  | -2.523967 | -1.773578 |
| H  | 2.575317  | -2.612114 | -3.830813 |
| H  | 1.917504  | -0.800684 | -5.524581 |
| H  | 0.305032  | 0.713123  | -4.827967 |
| H  | -1.102812 | -2.633532 | -1.038483 |
| H  | -2.150798 | -1.239497 | -0.469083 |
| H  | -1.500976 | -1.945517 | -3.411945 |
| H  | -2.860258 | 0.514901  | -2.112317 |
| H  | -2.328526 | 0.373382  | -3.865367 |

**M3C**

|   |          |          |          |
|---|----------|----------|----------|
| C | 0.000000 | 0.000000 | 0.000000 |
|---|----------|----------|----------|

Supplementary Material (ESI) for *Dalton Transactions*  
This journal is © The Royal Society of Chemistry 2008

|    |           |           |           |
|----|-----------|-----------|-----------|
| O  | 0.000000  | 0.000000  | 1.160076  |
| Mo | 0.036215  | 0.000000  | -2.007587 |
| C  | 1.062049  | -2.021185 | -1.216584 |
| C  | 0.656328  | -2.180806 | -2.558586 |
| C  | -0.723773 | -2.138706 | -2.836254 |
| O  | -0.117876 | 2.052224  | -1.968949 |
| C  | -0.709245 | 2.945897  | -1.128155 |
| N  | 0.194020  | 3.607390  | -0.142571 |
| C  | 0.297992  | 4.819175  | -0.998247 |
| C  | -0.931479 | 4.339327  | -1.805122 |
| C  | -1.978275 | -0.107561 | -1.842174 |
| O  | -3.130200 | -0.196194 | -1.792252 |
| N  | 0.227522  | 0.433305  | -4.155974 |
| C  | 1.332040  | 0.997790  | -4.560437 |
| C  | 2.403102  | 1.028663  | -3.598083 |
| N  | 2.130892  | 0.504843  | -2.433594 |
| O  | -1.824764 | 2.356772  | -0.485907 |
| H  | 1.059509  | 3.099650  | 0.027640  |
| H  | -1.919696 | 2.811212  | 0.362653  |
| H  | -0.516663 | 0.425850  | -4.851233 |
| H  | 1.463372  | 1.402245  | -5.563163 |
| H  | 3.378408  | 1.441175  | -3.852780 |
| H  | 2.908021  | 0.526961  | -1.775675 |
| H  | -1.068084 | -2.139038 | -3.866157 |
| H  | -1.415076 | -2.561051 | -2.112465 |
| H  | 1.383206  | -2.130572 | -3.364273 |
| H  | 2.119207  | -1.941528 | -0.980314 |
| H  | 0.443174  | -2.448348 | -0.432440 |
| H  | -1.869856 | 4.812178  | -1.504402 |
| H  | -0.841031 | 4.332358  | -2.892474 |
| H  | 1.211239  | 4.861573  | -1.606053 |
| H  | 0.195155  | 5.756817  | -0.441814 |

**TS4C**

|    |           |           |           |
|----|-----------|-----------|-----------|
| C  | 0.000000  | 0.000000  | 0.000000  |
| Mo | 0.000000  | 0.000000  | 2.004733  |
| N  | 2.187142  | 0.000000  | 2.417639  |
| C  | 2.561194  | -0.376640 | 3.609072  |
| C  | 1.509302  | -0.592580 | 4.575215  |
| N  | 0.290305  | -0.363930 | 4.178609  |
| O  | -0.003858 | 0.033920  | -1.158307 |
| C  | 0.436039  | 2.182795  | 1.217842  |
| C  | 0.010543  | 2.207443  | 2.566867  |
| C  | -1.319434 | 1.802856  | 2.814728  |
| O  | 0.434340  | -2.102742 | 2.071388  |
| C  | 1.024189  | -2.862644 | 1.252329  |
| O  | 0.593587  | -2.865075 | -0.029839 |
| C  | -1.929710 | -0.469899 | 1.788806  |
| O  | -3.042321 | -0.778314 | 1.667934  |
| C  | 1.761502  | -4.078633 | 1.832417  |
| C  | 3.121608  | -3.393229 | 2.020344  |
| N  | 3.034659  | -2.485565 | 0.902830  |
| H  | 3.773772  | -1.778501 | 0.888276  |
| H  | 1.363966  | -3.128444 | -0.562901 |
| H  | -0.421082 | -0.549319 | 4.882787  |
| H  | 1.750372  | -0.919134 | 5.586760  |
| H  | 3.604295  | -0.520821 | 3.885506  |
| H  | 2.945410  | 0.118681  | 1.751360  |
| H  | -1.666368 | 1.684569  | 3.837093  |
| H  | -2.087424 | 2.055457  | 2.089264  |
| H  | 0.715987  | 2.353471  | 3.379059  |

Supplementary Material (ESI) for *Dalton Transactions*  
This journal is © The Royal Society of Chemistry 2008

|   |           |           |          |
|---|-----------|-----------|----------|
| H | 1.479443  | 2.369579  | 0.980893 |
| H | -0.270971 | 2.465961  | 0.442984 |
| H | 1.815085  | -4.888569 | 1.099902 |
| H | 1.266272  | -4.435690 | 2.740410 |
| H | 3.129018  | -2.886561 | 3.017095 |
| H | 3.984014  | -4.082811 | 2.019888 |

[Mo(OCOCH<sub>2</sub>CH<sub>2</sub>NH<sub>2</sub>)((3-C<sub>3</sub>H<sub>5</sub>)(CO)<sub>2</sub>(N<sub>2</sub>C<sub>2</sub>H<sub>4</sub>)] (P)

|    |           |           |           |
|----|-----------|-----------|-----------|
| C  | -1.864010 | -0.063348 | -0.902540 |
| O  | -2.941386 | -0.235040 | -1.285057 |
| Mo | 0.023332  | 0.229389  | -0.242249 |
| C  | -1.233988 | 2.202833  | 0.139387  |
| C  | 0.148093  | 2.492157  | 0.186456  |
| C  | 0.876539  | 2.332666  | -1.009718 |
| N  | -0.283032 | -0.101041 | 1.877893  |
| C  | 0.754708  | -0.325075 | 2.638061  |
| C  | 2.030890  | -0.169570 | 1.995074  |
| N  | 1.985304  | 0.133922  | 0.723963  |
| C  | 0.551370  | 0.039231  | -2.181063 |
| O  | 0.875758  | -0.113003 | -3.282324 |
| O  | 0.179379  | -1.899551 | -0.288274 |
| C  | -0.588979 | -2.726896 | 0.355551  |
| C  | -0.222581 | -4.196974 | 0.142246  |
| C  | -1.047566 | -5.181406 | 0.971420  |
| N  | -2.445524 | -5.196238 | 0.528705  |
| O  | -1.540798 | -2.392650 | 1.080378  |
| H  | -1.181004 | -0.350816 | 2.288426  |
| H  | 0.671249  | -0.654667 | 3.672035  |
| H  | 2.964394  | -0.319552 | 2.535388  |
| H  | 2.898349  | 0.192897  | 0.276703  |
| H  | 0.846451  | -4.308059 | 0.361999  |
| H  | -0.346752 | -4.416237 | -0.925156 |
| H  | -0.928526 | -4.934867 | 2.040513  |
| H  | -0.634614 | -6.186539 | 0.822750  |
| H  | -2.872178 | -4.299097 | 0.749346  |
| H  | -2.971123 | -5.918227 | 1.013393  |
| H  | -1.814824 | 2.193815  | 1.056435  |
| H  | -1.786423 | 2.463507  | -0.759474 |
| H  | 0.656567  | 2.631737  | 1.136049  |
| H  | 1.958344  | 2.424990  | -1.003408 |
| H  | 0.392400  | 2.576936  | -1.951069 |

TS'A

|    |           |           |           |
|----|-----------|-----------|-----------|
| C  | -0.486331 | 0.607383  | -2.228325 |
| O  | -0.350457 | 0.643451  | -3.378181 |
| Mo | -0.638483 | 0.524858  | -0.221304 |
| O  | 1.091323  | -0.790538 | -0.453230 |
| C  | 1.348417  | -1.973610 | 0.435430  |
| O  | 0.526641  | -2.226760 | 1.314116  |
| N  | -0.228537 | 0.300352  | 1.897860  |
| C  | 0.668261  | 1.062666  | 2.458553  |
| C  | 1.240120  | 2.067192  | 1.602095  |
| N  | 0.818526  | 2.053100  | 0.364374  |
| C  | -2.869529 | 0.863445  | 0.512981  |
| C  | -2.210564 | 2.098557  | 0.327103  |
| C  | -1.839896 | 2.425338  | -0.996088 |
| C  | -1.701646 | -1.161045 | -0.545616 |
| O  | -2.302917 | -2.129047 | -0.740037 |
| C  | 2.219307  | -3.005078 | -0.313460 |
| C  | 3.576984  | -2.338785 | -0.002625 |
| N  | 3.066315  | -1.134203 | 0.683033  |
| H  | -0.501256 | -0.520512 | 2.436855  |
| H  | 1.020845  | 0.912106  | 3.477174  |

Supplementary Material (ESI) for *Dalton Transactions*  
This journal is © The Royal Society of Chemistry 2008

|   |           |           |           |
|---|-----------|-----------|-----------|
| H | 2.004513  | 2.755677  | 1.958259  |
| H | 1.280232  | 2.732075  | -0.238465 |
| H | -1.845336 | 2.673367  | 1.173213  |
| H | -2.497829 | 2.128357  | -1.808199 |
| H | -1.235021 | 3.306725  | -1.187022 |
| H | -3.564437 | 0.526093  | -0.251259 |
| H | -3.067902 | 0.500812  | 1.516724  |
| H | 2.073133  | -0.441181 | -0.152940 |
| H | 3.509124  | -0.943913 | 1.579797  |
| H | 2.090870  | -3.990417 | 0.142830  |
| H | 1.954074  | -3.064572 | -1.373969 |
| H | 4.186206  | -2.971590 | 0.654381  |
| H | 4.179656  | -2.111258 | -0.893574 |

**TS1'B**

|    |           |           |           |
|----|-----------|-----------|-----------|
| C  | 2.626021  | -0.406929 | -1.466318 |
| C  | 2.982364  | 0.303614  | -0.306289 |
| C  | 2.934054  | -0.383896 | 0.933281  |
| Mo | 0.769178  | -0.117312 | 0.010600  |
| O  | -1.373056 | -0.005441 | 1.096228  |
| C  | -2.309374 | -0.078608 | -0.090120 |
| C  | -3.450195 | -1.117081 | 0.171578  |
| C  | -4.425468 | 0.085308  | 0.177103  |
| N  | -3.283657 | 1.045576  | 0.066609  |
| N  | 0.364416  | 1.621411  | -1.216122 |
| C  | 0.371598  | 2.823523  | -0.706780 |
| C  | 0.737033  | 2.881408  | 0.683086  |
| N  | 0.908051  | 1.716492  | 1.253371  |
| C  | 0.369009  | -1.634536 | -1.267293 |
| O  | 0.156518  | -2.502052 | -2.000693 |
| C  | 0.749208  | -1.567886 | 1.407692  |
| O  | 0.713199  | -2.367750 | 2.245675  |
| O  | -1.566765 | -0.134994 | -1.167954 |
| H  | 2.866440  | -1.464353 | -1.530968 |
| H  | 2.535906  | 0.111594  | -2.415379 |
| H  | 3.121260  | 1.380796  | -0.338551 |
| H  | 3.222342  | -1.431903 | 0.950821  |
| H  | 3.131731  | 0.156976  | 1.853957  |
| H  | -0.062761 | 1.533850  | -2.136258 |
| H  | 0.041485  | 3.706405  | -1.251087 |
| H  | 0.806418  | 3.825668  | 1.221260  |
| H  | 1.109687  | 1.763696  | 2.250744  |
| H  | -3.304443 | 1.618339  | -0.773884 |
| H  | -5.008505 | 0.227628  | 1.092736  |
| H  | -5.105312 | 0.109239  | -0.681850 |
| H  | -3.366408 | -1.664317 | 1.113031  |
| H  | -3.573175 | -1.813175 | -0.660199 |
| H  | -1.586482 | 0.834713  | 1.531755  |

**M1'B**

|    |           |           |           |
|----|-----------|-----------|-----------|
| C  | 2.598065  | -0.340582 | -1.557413 |
| Mo | 0.790440  | -0.138009 | 0.014450  |
| O  | -1.207970 | -0.474465 | 0.471823  |
| C  | -2.386777 | 0.168579  | 0.320338  |
| C  | -3.588436 | -0.636930 | 0.913947  |
| C  | -3.943188 | -1.003180 | -0.545501 |
| N  | -3.029841 | 0.071525  | -1.028232 |
| C  | 2.973605  | 0.501287  | -0.488104 |
| C  | 3.093225  | -0.074174 | 0.789441  |
| N  | 0.245366  | 1.484482  | -1.341711 |
| C  | 0.091546  | 2.691095  | -0.862260 |
| C  | 0.355696  | 2.828679  | 0.542772  |
| N  | 0.726827  | 1.734189  | 1.146582  |
| C  | 0.474389  | -1.753380 | -1.148508 |
| O  | 0.244992  | -2.667901 | -1.822762 |
| C  | 1.017374  | -1.474693 | 1.516210  |
| O  | 1.110979  | -2.223412 | 2.393858  |

Supplementary Material (ESI) for *Dalton Transactions*  
This journal is © The Royal Society of Chemistry 2008

|   |           |           |           |
|---|-----------|-----------|-----------|
| O | -2.275943 | 1.533605  | 0.732567  |
| H | 2.403022  | 0.086657  | -2.536577 |
| H | 2.958373  | -1.365960 | -1.560816 |
| H | 2.979048  | 1.580954  | -0.610109 |
| H | 3.451809  | -1.096408 | 0.871783  |
| H | 3.266155  | 0.556370  | 1.655983  |
| H | 0.028175  | 1.406463  | -2.333711 |
| H | -0.233105 | 3.533741  | -1.469579 |
| H | 0.221081  | 3.777443  | 1.058225  |
| H | 0.853770  | 1.836790  | 2.151673  |
| H | -3.048372 | 1.976992  | 0.354517  |
| H | -2.381893 | -0.211112 | -1.760936 |
| H | -3.620040 | -2.015343 | -0.816531 |
| H | -4.983405 | -0.861931 | -0.857130 |
| H | -3.294090 | -1.453416 | 1.574586  |
| H | -4.331775 | -0.001705 | 1.403993  |

**TS2'B**

|    |           |           |           |
|----|-----------|-----------|-----------|
| C  | 0.804514  | -1.540242 | 1.491784  |
| O  | 0.743697  | -2.323196 | 2.343125  |
| Mo | 0.850711  | -0.136779 | 0.045712  |
| O  | -1.115505 | 0.296254  | 0.760985  |
| C  | -2.202381 | 0.448661  | 0.102422  |
| C  | -3.473146 | 0.865735  | 0.865973  |
| C  | -4.381355 | -0.313477 | 0.452971  |
| N  | -3.464523 | -0.998958 | -0.468708 |
| N  | 0.464565  | 1.623347  | -1.174209 |
| C  | 0.548943  | 2.796966  | -0.615329 |
| C  | 1.092301  | 2.809711  | 0.719529  |
| N  | 1.382968  | 1.638987  | 1.218270  |
| C  | 2.343902  | -0.706158 | -1.703420 |
| C  | 3.045843  | -0.076870 | -0.651338 |
| C  | 3.102086  | -0.762092 | 0.579541  |
| C  | 0.000093  | -1.565007 | -1.097749 |
| O  | -0.471510 | -2.394307 | -1.751504 |
| O  | -2.155041 | 0.765482  | -1.219959 |
| H  | -0.051242 | 1.605372  | -2.052421 |
| H  | 0.194324  | 3.708138  | -1.093866 |
| H  | 1.226408  | 3.739634  | 1.270223  |
| H  | 1.726114  | 1.667589  | 2.176876  |
| H  | 3.352429  | 0.962181  | -0.728574 |
| H  | 3.171675  | -1.846168 | 0.570396  |
| H  | 3.524774  | -0.274738 | 1.453115  |
| H  | 2.408049  | -1.786955 | -1.795389 |
| H  | 2.167515  | -0.169562 | -2.630546 |
| H  | -2.882232 | -0.021813 | -1.428120 |
| H  | -3.500542 | -2.015451 | -0.413749 |
| H  | -3.272730 | 0.904459  | 1.940117  |
| H  | -3.809235 | 1.853449  | 0.529020  |
| H  | -4.630478 | -0.920900 | 1.333529  |
| H  | -5.334055 | -0.002048 | -0.005986 |

**TS1'C**

|    |           |           |           |
|----|-----------|-----------|-----------|
| C  | 0.000000  | 0.000000  | 0.000000  |
| O  | 0.000000  | 0.000000  | 1.159397  |
| Mo | 0.011445  | 0.000000  | -2.009912 |
| N  | -1.690902 | -1.294329 | -2.379253 |
| C  | -2.232136 | -1.293674 | -3.565190 |
| C  | -1.515819 | -0.548825 | -4.567717 |
| N  | -0.438785 | 0.063000  | -4.147419 |
| O  | -1.529514 | 1.487145  | -1.901284 |
| C  | -2.763302 | 1.601743  | -1.066319 |
| O  | -3.561692 | 2.020919  | -2.065862 |
| N  | -3.144991 | 0.362836  | -0.335359 |
| C  | -3.221549 | 1.116191  | 0.957075  |

Supplementary Material (ESI) for *Dalton Transactions*  
This journal is © The Royal Society of Chemistry 2008

|   |           |           |           |
|---|-----------|-----------|-----------|
| C | -2.620139 | 2.369321  | 0.275657  |
| C | 1.214968  | 1.612062  | -1.828180 |
| O | 1.867685  | 2.562935  | -1.732786 |
| C | 1.017970  | -2.018997 | -1.234118 |
| C | 1.414517  | -1.746901 | -2.560004 |
| C | 2.195761  | -0.590147 | -2.773259 |
| H | -4.051187 | 0.042281  | -0.672114 |
| H | -4.245857 | 1.257116  | 1.319124  |
| H | -2.618214 | 0.662374  | 1.748672  |
| H | -3.228510 | 3.274731  | 0.309464  |
| H | -1.591207 | 2.600670  | 0.559651  |
| H | -2.381937 | 1.811108  | -2.632411 |
| H | -2.257623 | -1.702850 | -1.636856 |
| H | -3.181567 | -1.777632 | -3.786811 |
| H | -1.871902 | -0.485733 | -5.594386 |
| H | 0.028058  | 0.618688  | -4.862433 |
| H | 2.433114  | -0.278048 | -3.785991 |
| H | 2.921575  | -0.305381 | -2.016607 |
| H | 0.974651  | -2.286495 | -3.393604 |
| H | 0.314160  | -2.820955 | -1.034211 |
| H | 1.708360  | -1.790028 | -0.427270 |

**M1'C**

|    |           |           |           |
|----|-----------|-----------|-----------|
| C  | 0.000000  | 0.000000  | 0.000000  |
| Mo | 0.000000  | 0.000000  | 2.009231  |
| O  | 2.062895  | 0.000000  | 1.908989  |
| C  | 3.003210  | -0.955632 | 1.664385  |
| C  | 3.010936  | -1.822786 | 0.362634  |
| C  | 3.299683  | -3.027962 | 1.289326  |
| N  | 2.921211  | -2.195758 | 2.463183  |
| O  | 0.025294  | 0.024319  | -1.159727 |
| C  | -0.040043 | -2.009377 | 1.832961  |
| O  | -0.130486 | -3.157816 | 1.707938  |
| N  | 0.428544  | 0.232568  | 4.155255  |
| C  | 0.940913  | 1.366168  | 4.541579  |
| C  | 0.942544  | 2.420608  | 3.557278  |
| N  | 0.424048  | 2.115473  | 2.399340  |
| C  | -2.075275 | -0.828291 | 2.880091  |
| C  | -2.198468 | 0.537912  | 2.552689  |
| C  | -2.090245 | 0.893548  | 1.192756  |
| O  | 4.282802  | -0.332263 | 1.858627  |
| H  | 3.566188  | -2.213539 | 3.250636  |
| H  | 4.083683  | 0.611525  | 1.929803  |
| H  | 0.456125  | -0.504821 | 4.857220  |
| H  | 1.334279  | 1.532828  | 5.543613  |
| H  | 1.337342  | 3.408294  | 3.791428  |
| H  | 0.445779  | 2.874262  | 1.720219  |
| H  | -2.042314 | -1.133123 | 3.921767  |
| H  | -2.481301 | -1.565506 | 2.193101  |
| H  | -2.175749 | 1.298374  | 3.327835  |
| H  | -2.063558 | 1.941232  | 0.908054  |
| H  | -2.490722 | 0.216503  | 0.443440  |
| H  | 3.786495  | -1.552698 | -0.355586 |
| H  | 2.041620  | -1.875230 | -0.135630 |
| H  | 2.665337  | -3.911417 | 1.161627  |
| H  | 4.353916  | -3.331498 | 1.277321  |

**TS2'C**

|    |          |          |           |
|----|----------|----------|-----------|
| C  | 0.000000 | 0.000000 | 0.000000  |
| O  | 0.000000 | 0.000000 | 1.162077  |
| Mo | 0.045195 | 0.000000 | -2.000852 |



Supplementary Material (ESI) for *Dalton Transactions*  
This journal is © The Royal Society of Chemistry 2008

|   |           |           |           |
|---|-----------|-----------|-----------|
| C | -1.282097 | -1.863639 | -1.221585 |
| C | -1.537957 | -1.594806 | -2.581621 |
| C | -2.141388 | -0.358162 | -2.898138 |
| O | 1.812551  | 1.045445  | -1.914878 |
| C | 2.184931  | 2.308264  | -1.630657 |
| O | 3.612956  | 2.357323  | -1.844619 |
| C | -1.021324 | 1.692171  | -1.819999 |
| O | -1.680519 | 2.637682  | -1.688920 |
| N | 0.568125  | 0.028282  | -4.152913 |
| C | 1.635835  | -0.625623 | -4.499029 |
| C | 2.184772  | -1.520446 | -3.501460 |
| N | 1.538040  | -1.586082 | -2.375655 |
| C | 1.769468  | 3.051173  | -0.313402 |
| C | 1.452877  | 4.267216  | -1.216510 |
| N | 1.494145  | 3.376094  | -2.403425 |
| H | 2.034465  | 3.714539  | -3.197008 |
| H | 4.033638  | 2.789515  | -1.092245 |
| H | 0.207632  | 0.657791  | -4.867802 |
| H | 2.098628  | -0.538307 | -5.481566 |
| H | 3.076953  | -2.108566 | -3.712862 |
| H | 1.953808  | -2.216071 | -1.691938 |
| H | -2.258722 | -0.066982 | -3.937914 |
| H | -2.885401 | 0.046166  | -2.217498 |
| H | -1.112501 | -2.221305 | -3.360132 |
| H | -0.714177 | -2.746422 | -0.942619 |
| H | -1.988353 | -1.507750 | -0.476829 |
| H | 2.546895  | 3.171193  | 0.448140  |
| H | 0.885345  | 2.615994  | 0.153519  |
| H | 0.482014  | 4.750373  | -1.066592 |
| H | 2.240622  | 5.033126  | -1.194414 |

**M2'C**

|    |           |           |           |
|----|-----------|-----------|-----------|
| C  | 0.000000  | 0.000000  | 0.000000  |
| O  | 0.000000  | 0.000000  | 1.160062  |
| Mo | 0.104029  | 0.000000  | -2.005638 |
| N  | -1.234214 | -1.687519 | -2.536726 |
| C  | -1.776389 | -1.647510 | -3.716096 |
| C  | -1.226954 | -0.673249 | -4.636849 |
| N  | -0.235631 | 0.038547  | -4.190382 |
| O  | -1.683732 | 0.998946  | -2.144553 |
| C  | -2.497845 | 1.666316  | -1.307884 |
| O  | -3.596711 | 2.093861  | -2.137750 |
| N  | -2.953608 | 0.926230  | -0.100125 |
| C  | -2.845554 | 2.137369  | 0.749139  |
| C  | -1.999784 | 2.813642  | -0.358081 |
| C  | 1.035112  | 1.752262  | -1.750335 |
| O  | 1.563041  | 2.779012  | -1.618599 |
| C  | 1.439806  | -1.792688 | -1.157183 |
| C  | 1.838984  | -1.468445 | -2.472012 |
| C  | 2.414605  | -0.198448 | -2.681625 |
| H  | -3.867761 | 0.485433  | -0.180455 |
| H  | -3.798840 | 2.652701  | 0.941991  |
| H  | -2.347517 | 1.956860  | 1.707374  |
| H  | -2.274380 | 3.828080  | -0.658710 |
| H  | -0.927107 | 2.775059  | -0.165876 |
| H  | -1.642729 | -2.376360 | -1.907506 |
| H  | -2.583796 | -2.310204 | -4.026292 |
| H  | -1.625615 | -0.575730 | -5.645877 |
| H  | 0.121510  | 0.720819  | -4.856892 |
| H  | 2.626961  | 0.138248  | -3.692179 |
| H  | 3.049590  | 0.221388  | -1.906576 |

Supplementary Material (ESI) for *Dalton Transactions*  
 This journal is © The Royal Society of Chemistry 2008

|   |           |           |           |
|---|-----------|-----------|-----------|
| H | 1.538712  | -2.086665 | -3.312979 |
| H | 0.897845  | -2.715421 | -0.971113 |
| H | 2.043757  | -1.435831 | -0.327610 |
| H | -4.164884 | 2.678813  | -1.617898 |

**TS3'C**

|    |           |           |           |
|----|-----------|-----------|-----------|
| C  | 0.000000  | 0.000000  | 0.000000  |
| O  | 0.000000  | 0.000000  | 1.162984  |
| Mo | 0.036093  | 0.000000  | -1.995587 |
| N  | -2.027286 | -0.623948 | -2.456038 |
| C  | -2.497454 | -0.278248 | -3.616723 |
| C  | -1.525834 | 0.198477  | -4.576678 |
| N  | -0.292574 | 0.246234  | -4.162837 |
| O  | -0.903647 | 1.834501  | -2.046574 |
| C  | -1.246188 | 2.683244  | -1.044915 |
| O  | -2.327684 | 2.050183  | -0.325377 |
| C  | -1.523236 | 4.155160  | -1.516833 |
| C  | -0.394845 | 4.617518  | -0.550309 |
| N  | -0.221453 | 3.223838  | -0.169118 |
| C  | 1.756580  | 1.016769  | -1.752531 |
| O  | 2.742727  | 1.613126  | -1.625123 |
| C  | 0.197958  | -2.260473 | -1.229292 |
| C  | 0.711694  | -2.155194 | -2.539864 |
| C  | 1.877955  | -1.384840 | -2.723790 |
| H  | 0.338060  | 2.792949  | 0.551653  |
| H  | -2.417015 | 2.516234  | 0.517152  |
| H  | -1.319033 | 4.302551  | -2.578761 |
| H  | -2.523477 | 4.518165  | -1.268648 |
| H  | -0.726194 | 5.288310  | 0.256383  |
| H  | -0.756869 | -2.750553 | -1.063545 |
| H  | 0.898192  | -2.313972 | -0.400417 |
| H  | 0.123752  | -2.484233 | -3.391750 |
| H  | 2.241243  | -1.184330 | -3.727588 |
| H  | 2.635753  | -1.389121 | -1.945452 |
| H  | -2.734852 | -0.911412 | -1.782439 |
| H  | -3.553931 | -0.339828 | -3.875203 |
| H  | -1.828178 | 0.479815  | -5.584813 |
| H  | 0.367611  | 0.591927  | -4.857158 |
| H  | 0.475479  | 5.072391  | -1.044477 |

[Mo(OCOCH<sub>2</sub>CH<sub>2</sub>NH<sub>2</sub>)((3-C<sub>3</sub>H<sub>5</sub>)(CO)<sub>2</sub>(N<sub>2</sub>C<sub>2</sub>H<sub>4</sub>)] (P')

|    |           |           |           |
|----|-----------|-----------|-----------|
| C  | -1.383226 | -1.025845 | 1.689923  |
| O  | -1.620255 | -1.660136 | 2.632150  |
| Mo | -0.900059 | 0.071323  | 0.079391  |
| C  | -1.229404 | -1.632785 | -0.941041 |
| O  | -1.417848 | -2.619735 | -1.515409 |
| O  | 1.062722  | -0.694510 | 0.437904  |
| C  | 1.932098  | -0.995847 | -0.480052 |
| C  | 3.299997  | -1.404692 | 0.071555  |
| C  | 3.912160  | -0.380002 | 1.030362  |
| N  | 4.153076  | 0.904023  | 0.346141  |
| C  | -2.930423 | 0.929535  | 0.998271  |
| C  | -2.748495 | 1.370360  | -0.329570 |
| C  | -2.767319 | 0.382573  | -1.340817 |
| N  | -0.061703 | 1.873132  | 1.033653  |
| C  | 0.752368  | 2.605520  | 0.328375  |
| C  | 0.903166  | 2.221533  | -1.054827 |
| N  | 0.171424  | 1.218010  | -1.441055 |
| O  | 1.719857  | -0.987355 | -1.700888 |

Supplementary Material (ESI) for *Dalton Transactions*  
This journal is © The Royal Society of Chemistry 2008

|   |           |           |           |
|---|-----------|-----------|-----------|
| H | -0.120946 | 2.141026  | 2.014443  |
| H | 1.309898  | 3.443347  | 0.744099  |
| H | 1.626353  | 2.714215  | -1.701228 |
| H | 0.384732  | 0.865387  | -2.372554 |
| H | 3.966359  | -1.589606 | -0.777637 |
| H | 3.177059  | -2.353524 | 0.608243  |
| H | 4.828477  | -0.812053 | 1.465867  |
| H | 3.209497  | -0.198124 | 1.849578  |
| H | 4.769853  | 0.767302  | -0.452293 |
| H | 4.622547  | 1.555669  | 0.970156  |
| H | -2.806112 | 1.627207  | 1.821323  |
| H | -3.612444 | 0.105347  | 1.187093  |
| H | -2.417505 | 2.382463  | -0.543586 |
| H | -2.512852 | 0.653024  | -2.361213 |
| H | -3.455584 | -0.452206 | -1.239260 |

**TS-PP'**

|    |           |           |           |
|----|-----------|-----------|-----------|
| Mo | 0.985256  | 0.014712  | 0.068947  |
| N  | 0.358694  | 1.602009  | -1.316670 |
| C  | 0.491920  | 2.844412  | -0.948550 |
| C  | 1.122414  | 3.045659  | 0.331900  |
| N  | 1.456768  | 1.957759  | 0.961313  |
| C  | 0.193006  | -1.612760 | -0.820937 |
| O  | -0.294781 | -2.530947 | -1.330486 |
| C  | 1.265017  | -1.211666 | 1.639790  |
| O  | 1.392232  | -1.897054 | 2.564659  |
| O  | -0.991579 | 0.085213  | 0.872805  |
| C  | -1.793424 | 1.053571  | 1.226079  |
| O  | -1.481381 | 2.244481  | 1.346137  |
| C  | -3.219047 | 0.565544  | 1.498039  |
| C  | -4.171431 | 1.643006  | 2.016117  |
| N  | -4.399633 | 2.679077  | 0.999486  |
| H  | -0.138342 | 1.480909  | -2.197670 |
| H  | 0.121896  | 3.681627  | -1.537498 |
| H  | 1.247864  | 4.040670  | 0.752910  |
| H  | 1.834389  | 2.120146  | 1.893245  |
| H  | -3.153173 | -0.265929 | 2.210253  |
| H  | -3.607823 | 0.142651  | 0.563266  |
| H  | -3.774292 | 2.045104  | 2.963030  |
| H  | -5.135516 | 1.171881  | 2.242146  |
| H  | -3.535920 | 3.203420  | 0.879245  |
| H  | -5.117234 | 3.329794  | 1.307154  |
| C  | 3.325910  | -0.300162 | 0.403871  |
| C  | 3.073132  | 0.223773  | -0.884036 |
| C  | 2.372139  | -0.599830 | -1.786742 |
| H  | 2.048663  | -0.202466 | -2.744006 |
| H  | 2.546207  | -1.671837 | -1.759906 |
| H  | 3.245398  | 1.273527  | -1.103645 |
| H  | 3.768702  | 0.334949  | 1.165499  |
| H  | 3.544400  | -1.360292 | 0.500571  |

N-sulfonate azetidin-2-one

|   |          |          |          |
|---|----------|----------|----------|
| C | 0.000000 | 0.000000 | 0.000000 |
|---|----------|----------|----------|

Supplementary Material (ESI) for *Dalton Transactions*  
This journal is © The Royal Society of Chemistry 2008

|   |           |           |           |
|---|-----------|-----------|-----------|
| C | 0.000000  | 0.000000  | 1.552374  |
| C | 1.543449  | 0.000000  | 1.432918  |
| O | 2.450929  | -0.054616 | 2.240858  |
| N | 1.470098  | 0.077234  | 0.059677  |
| S | 2.580996  | -0.171772 | -1.319680 |
| O | 1.744836  | 0.383852  | -2.412706 |
| O | 2.762522  | -1.641293 | -1.369452 |
| O | 3.778638  | 0.608625  | -0.958304 |
| H | -0.455656 | 0.864092  | -0.491713 |
| H | -0.363584 | -0.923700 | -0.463093 |
| H | -0.403085 | -0.898744 | 2.028380  |
| H | -0.413692 | 0.893382  | 2.029244  |

**TS1B-s**

|    |           |           |           |
|----|-----------|-----------|-----------|
| C  | 0.000000  | 0.000000  | 0.000000  |
| Mo | 0.000000  | 0.000000  | 2.368995  |
| C  | 1.899967  | 0.000000  | 3.115638  |
| O  | 2.988803  | 0.056591  | 3.494293  |
| C  | 0.099073  | 1.319764  | 0.517582  |
| C  | 1.269131  | 1.666813  | 1.215459  |
| O  | -1.035204 | -1.417741 | 3.948862  |
| C  | -0.387235 | -0.963621 | 5.202096  |
| O  | 0.385001  | 0.057481  | 4.893672  |
| N  | -2.163165 | 0.078641  | 1.936636  |
| C  | -2.874138 | 1.071699  | 2.406192  |
| C  | -2.149215 | 1.970991  | 3.255850  |
| N  | -0.869808 | 1.710036  | 3.352475  |
| C  | 0.503695  | -1.836490 | 1.659022  |
| O  | 0.747950  | -2.860156 | 1.180698  |
| C  | -1.448465 | -0.830452 | 6.342643  |
| C  | -1.007591 | -2.222124 | 6.841934  |
| N  | 0.195201  | -2.142414 | 5.975159  |
| S  | 0.702395  | -3.601142 | 5.193100  |
| O  | 1.962742  | -3.260481 | 4.503375  |
| O  | 0.776504  | -4.599634 | 6.281988  |
| O  | -0.431587 | -3.894108 | 4.212461  |
| H  | 0.901729  | -0.463997 | -0.393224 |
| H  | -0.919349 | -0.318628 | -0.482667 |
| H  | -0.766735 | 1.977219  | 0.528526  |
| H  | 2.216803  | 1.230363  | 0.911096  |
| H  | 1.334997  | 2.620050  | 1.730514  |
| H  | -2.696839 | -0.628140 | 1.435496  |
| H  | -3.947916 | 1.167657  | 2.246163  |
| H  | -2.652429 | 2.726848  | 3.857293  |
| H  | -0.374492 | 2.175046  | 4.110598  |
| H  | -1.701708 | -3.021564 | 6.552625  |
| H  | -0.761194 | -2.323266 | 7.903730  |
| H  | -2.483268 | -0.733099 | 6.002221  |
| H  | -1.186547 | -0.014283 | 7.021339  |
| H  | -0.912767 | -2.426620 | 3.893588  |

**M1B-s**

|    |           |           |           |
|----|-----------|-----------|-----------|
| C  | 0.000000  | 0.000000  | 0.000000  |
| O  | 0.000000  | 0.000000  | 1.152073  |
| Mo | 0.306372  | 0.000000  | -2.035377 |
| C  | -1.645586 | -0.584545 | -2.295553 |
| O  | -2.684716 | -1.018145 | -2.542993 |
| N  | 0.784632  | 0.511098  | -4.074775 |
| C  | 1.801074  | 1.324631  | -4.278772 |
| C  | 2.612221  | 1.580182  | -3.138149 |
| N  | 2.235671  | 0.966172  | -2.032802 |

Supplementary Material (ESI) for *Dalton Transactions*  
This journal is © The Royal Society of Chemistry 2008

|   |           |           |           |
|---|-----------|-----------|-----------|
| C | 0.250931  | -2.213700 | -2.983695 |
| C | 1.518245  | -1.991526 | -2.407100 |
| C | 1.590787  | -1.806945 | -1.015857 |
| O | -0.328467 | 1.919619  | -1.964728 |
| C | -1.502780 | 2.560125  | -1.697354 |
| O | -2.497501 | 2.124265  | -2.588063 |
| N | -1.930550 | 2.589804  | -0.234840 |
| S | -3.356800 | 1.761242  | 0.325521  |
| O | -2.973488 | 0.330966  | 0.353181  |
| C | -1.326427 | 4.109737  | -1.625642 |
| C | -2.006992 | 4.074725  | -0.241397 |
| O | -3.635161 | 2.394016  | 1.635032  |
| O | -4.409914 | 2.067055  | -0.717915 |
| H | -1.464912 | 4.529426  | 0.594707  |
| H | -3.035398 | 4.453672  | -0.250814 |
| H | -0.273191 | 4.400807  | -1.612025 |
| H | -1.863704 | 4.646750  | -2.411559 |
| H | 2.810512  | 1.179948  | -1.220553 |
| H | 3.486864  | 2.227107  | -3.187822 |
| H | 2.018921  | 1.767547  | -5.249568 |
| H | 0.189512  | 0.370371  | -4.888124 |
| H | -3.363610 | 2.105952  | -2.103778 |
| H | -0.476663 | -2.796424 | -2.425076 |
| H | 0.147146  | -2.247230 | -4.064259 |
| H | 2.367033  | -1.736433 | -3.036307 |
| H | 0.898397  | -2.349610 | -0.378211 |
| H | 2.526535  | -1.507616 | -0.553124 |

**TS2B1-s**

|    |           |           |           |
|----|-----------|-----------|-----------|
| C  | 0.000000  | 0.000000  | 0.000000  |
| Mo | 0.000000  | 0.000000  | 2.049703  |
| O  | 2.021532  | 0.000000  | 1.793143  |
| C  | 2.881155  | -1.037272 | 1.676139  |
| C  | 4.372362  | -0.582062 | 1.804352  |
| C  | 4.734945  | -1.097161 | 0.402179  |
| N  | 3.315330  | -1.277931 | -0.002361 |
| S  | 2.939012  | -2.736925 | -0.706463 |
| O  | 3.123685  | -3.793623 | 0.494589  |
| O  | -0.008093 | 0.124873  | -1.146852 |
| C  | 0.061431  | -2.079529 | 1.996842  |
| O  | -0.146913 | -3.214858 | 2.025182  |
| N  | 0.470217  | 0.275214  | 4.125449  |
| C  | 0.923577  | 1.456449  | 4.505528  |
| C  | 0.858461  | 2.471659  | 3.517460  |
| N  | 0.351057  | 2.090560  | 2.355787  |
| C  | -2.035339 | -0.869460 | 2.968333  |
| C  | -2.238821 | 0.480396  | 2.617615  |
| C  | -2.151003 | 0.829327  | 1.258790  |
| O  | 2.529768  | -2.166210 | 2.253418  |
| O  | 1.519100  | -2.692630 | -1.089043 |
| O  | 3.928104  | -3.088066 | -1.741699 |
| H  | 5.257761  | -0.386558 | -0.248966 |
| H  | 5.307258  | -2.031674 | 0.424750  |
| H  | 4.444486  | 0.504323  | 1.908170  |
| H  | 4.881476  | -1.075661 | 2.637793  |
| H  | 0.361847  | 2.815129  | 1.641222  |
| H  | 1.205298  | 3.486383  | 3.704939  |
| H  | 1.324856  | 1.642607  | 5.500558  |
| H  | 0.589953  | -0.464870 | 4.813297  |
| H  | 2.849728  | -3.231411 | 1.364188  |
| H  | -2.392748 | -1.639926 | 2.290287  |

Supplementary Material (ESI) for *Dalton Transactions*  
This journal is © The Royal Society of Chemistry 2008

|   |           |           |          |
|---|-----------|-----------|----------|
| H | -1.982655 | -1.155129 | 4.014602 |
| H | -2.214722 | 1.253585  | 3.381398 |
| H | -2.494785 | 0.117479  | 0.512950 |
| H | -2.165309 | 1.873131  | 0.960045 |

**M2B1-s**

|    |           |           |           |
|----|-----------|-----------|-----------|
| C  | 0.000000  | 0.000000  | 0.000000  |
| O  | 0.000000  | 0.000000  | 1.167535  |
| Mo | 0.021313  | 0.000000  | -1.981644 |
| N  | 0.334847  | 0.339148  | -4.184618 |
| C  | 0.330607  | 1.548397  | -4.632877 |
| C  | -0.029709 | 2.599033  | -3.671329 |
| N  | -0.357345 | 2.199809  | -2.485987 |
| C  | 0.750215  | -1.820961 | -1.705396 |
| O  | 1.186147  | -2.886462 | -1.524359 |
| C  | -1.529960 | -1.575481 | -2.774834 |
| C  | -2.133951 | -0.305732 | -2.578201 |
| C  | -2.235868 | 0.149419  | -1.244922 |
| O  | 1.991144  | 0.741369  | -1.851088 |
| C  | 2.894718  | 1.140873  | -2.691508 |
| C  | 3.577390  | 2.453786  | -2.297279 |
| C  | 3.830601  | 3.356907  | -3.509236 |
| N  | 2.567960  | 3.575109  | -4.236535 |
| S  | 2.711814  | 3.560518  | -5.817932 |
| O  | 3.097525  | 1.962533  | -6.234921 |
| O  | 3.219061  | 0.537141  | -3.729393 |
| O  | 3.827440  | 4.351514  | -6.380282 |
| O  | 1.375478  | 3.773935  | -6.426761 |
| H  | 3.247409  | 1.462636  | -5.398388 |
| H  | -1.333918 | -1.918346 | -3.787340 |
| H  | -1.722627 | -2.365823 | -2.053479 |
| H  | -2.440103 | -0.565816 | -0.452770 |
| H  | -2.570202 | 1.164731  | -1.049700 |
| H  | -2.350891 | 0.350398  | -3.415504 |
| H  | -0.569967 | 2.958597  | -1.841063 |
| H  | -0.007557 | 3.636074  | -3.993033 |
| H  | 0.598648  | 1.831605  | -5.647591 |
| H  | 0.673548  | -0.342105 | -4.861570 |
| H  | 2.947848  | 2.959980  | -1.559472 |
| H  | 4.531540  | 2.215628  | -1.805341 |
| H  | 4.242979  | 4.316288  | -3.157537 |
| H  | 4.611323  | 2.899213  | -4.131567 |

**TS3B1-s**

|    |           |           |           |
|----|-----------|-----------|-----------|
| C  | 0.000000  | 0.000000  | 0.000000  |
| Mo | 0.000000  | 0.000000  | 1.983227  |
| O  | 2.112640  | 0.000000  | 1.904566  |
| C  | 2.963363  | 0.480367  | 2.762681  |
| O  | 2.713018  | 1.363783  | 3.598262  |
| O  | 0.010544  | 0.009613  | -1.167042 |
| N  | 0.451303  | -0.180635 | 4.173042  |
| C  | 0.959158  | -1.291400 | 4.590169  |
| C  | 0.982185  | -2.401027 | 3.633131  |
| N  | 0.481076  | -2.158835 | 2.467896  |
| C  | 0.030012  | 1.971694  | 1.721657  |
| O  | 0.041580  | 3.121482  | 1.542590  |
| C  | -2.020819 | 0.896139  | 2.761187  |
| C  | -2.125456 | -0.506757 | 2.565861  |
| C  | -2.040579 | -0.966230 | 1.232712  |
| C  | 4.349198  | -0.162977 | 2.709559  |
| C  | 4.731645  | -0.798542 | 4.063466  |

Supplementary Material (ESI) for *Dalton Transactions*  
This journal is © The Royal Society of Chemistry 2008

|   |           |           |          |
|---|-----------|-----------|----------|
| N | 3.858400  | -1.892540 | 4.499778 |
| S | 4.326865  | -3.482945 | 4.162143 |
| O | 3.390173  | -4.229607 | 3.282415 |
| O | 4.014872  | -3.810885 | 5.703536 |
| O | 5.758530  | -3.620978 | 3.816863 |
| H | 3.871648  | -2.610868 | 5.682902 |
| H | -1.970184 | 1.289352  | 3.773234 |
| H | -2.480500 | 1.561503  | 2.034478 |
| H | -2.480578 | -0.370140 | 0.437806 |
| H | -1.978763 | -2.032624 | 1.034141 |
| H | -2.095954 | -1.197375 | 3.403097 |
| H | 0.586982  | -2.938554 | 1.820361 |
| H | 1.452381  | -3.347669 | 3.889961 |
| H | 1.396094  | -1.421447 | 5.576390 |
| H | 0.560083  | 0.601345  | 4.815621 |
| H | 4.383976  | -0.908687 | 1.910777 |
| H | 5.081386  | 0.623762  | 2.481168 |
| H | 5.782004  | -1.121996 | 4.017418 |
| H | 4.656377  | -0.018571 | 4.830365 |

**M2B2-s**

|    |           |           |           |
|----|-----------|-----------|-----------|
| C  | 0.000000  | 0.000000  | 0.000000  |
| O  | 0.000000  | 0.000000  | 1.155509  |
| Mo | 0.213543  | 0.000000  | -2.030408 |
| C  | 2.367125  | -0.114443 | -1.011249 |
| C  | 2.521053  | 0.350582  | -2.337092 |
| C  | 1.966111  | 1.597574  | -2.661255 |
| O  | -1.713302 | -0.647705 | -2.195847 |
| C  | -2.659480 | -1.194717 | -1.396751 |
| O  | -2.051559 | -1.832894 | -0.269926 |
| C  | -3.666565 | -2.088624 | -2.196975 |
| C  | -4.738950 | -1.008491 | -1.925015 |
| N  | -3.835417 | -0.387605 | -0.936419 |
| S  | -3.840008 | 1.343110  | -0.727943 |
| O  | -5.120136 | 1.583969  | -0.014243 |
| O  | -2.607936 | 1.556205  | 0.081461  |
| O  | -3.794175 | 1.943584  | -2.090807 |
| C  | -0.533680 | 1.931245  | -1.965743 |
| O  | -0.826724 | 3.042298  | -2.015883 |
| N  | 0.143933  | -0.308370 | -4.167141 |
| C  | 0.123235  | -1.557561 | -4.589825 |
| C  | 0.422989  | -2.539900 | -3.604475 |
| N  | 0.662673  | -2.073544 | -2.394900 |
| H  | -2.583972 | -1.545026 | 0.486619  |
| H  | -3.381456 | -2.234395 | -3.241403 |
| H  | -3.853362 | -3.047994 | -1.706557 |
| H  | -4.926860 | -0.359964 | -2.790295 |
| H  | -5.692067 | -1.338082 | -1.496360 |
| H  | 0.830841  | -2.788801 | -1.691265 |
| H  | 0.463420  | -3.600954 | -3.847184 |
| H  | -0.089262 | -1.829168 | -5.622997 |
| H  | -0.108597 | 0.377658  | -4.874874 |
| H  | 1.950262  | 2.378958  | -1.906815 |
| H  | 1.930531  | 1.931497  | -3.693688 |
| H  | 2.695280  | -1.115946 | -0.748837 |
| H  | 2.410039  | 0.615084  | -0.206356 |
| H  | 2.844034  | -0.327813 | -3.121929 |

**TS2B2-s**

|    |          |          |          |
|----|----------|----------|----------|
| C  | 0.000000 | 0.000000 | 0.000000 |
| Mo | 0.000000 | 0.000000 | 2.037586 |

Supplementary Material (ESI) for *Dalton Transactions*  
This journal is © The Royal Society of Chemistry 2008

|   |           |           |           |
|---|-----------|-----------|-----------|
| N | 2.144249  | 0.000000  | 2.428114  |
| C | 2.540565  | -0.459948 | 3.603976  |
| C | 1.507603  | -0.739059 | 4.539467  |
| N | 0.276290  | -0.484860 | 4.130225  |
| O | 0.086087  | 0.045957  | -1.150436 |
| C | 0.483301  | 2.200635  | 1.269916  |
| C | 0.090005  | 2.218470  | 2.624491  |
| C | -1.231721 | 1.815144  | 2.915575  |
| C | -1.997665 | -0.400001 | 1.888615  |
| O | -3.138555 | -0.551997 | 1.898687  |
| O | 0.393763  | -2.107753 | 1.805055  |
| C | -0.194248 | -3.153737 | 2.158841  |
| O | -1.120063 | -3.104369 | 3.147534  |
| C | 0.369930  | -4.506783 | 1.732349  |
| C | -0.513771 | -4.827557 | 0.513946  |
| N | -1.753919 | -4.179391 | 0.914746  |
| S | -2.694095 | -3.564038 | -0.345510 |
| O | -2.630679 | -4.551265 | -1.469708 |
| O | -4.045648 | -3.379948 | 0.248361  |
| O | -2.023676 | -2.257089 | -0.699005 |
| H | -0.452724 | -0.774523 | 4.777458  |
| H | 1.726169  | -1.147217 | 5.525164  |
| H | 3.589450  | -0.620643 | 3.849848  |
| H | 2.898866  | 0.155859  | 1.764280  |
| H | 0.827823  | 2.316248  | 3.415532  |
| H | -0.244346 | 2.472434  | 0.510115  |
| H | 1.522548  | 2.374996  | 1.006683  |
| H | -2.024389 | 2.085195  | 2.223137  |
| H | -1.539378 | 1.684956  | 3.948812  |
| H | -1.820026 | -3.689556 | 2.737946  |
| H | 1.440714  | -4.424858 | 1.514630  |
| H | 0.217811  | -5.225070 | 2.544819  |
| H | -0.074569 | -4.368764 | -0.384162 |
| H | -0.614480 | -5.907518 | 0.312136  |

**P-s**

|    |           |           |           |
|----|-----------|-----------|-----------|
| C  | 0.000000  | 0.000000  | 0.000000  |
| Mo | 0.000000  | 0.000000  | 2.002817  |
| O  | 2.106386  | 0.000000  | 2.052339  |
| C  | 2.960300  | -0.216162 | 1.082971  |
| C  | 4.241513  | 0.613539  | 1.214900  |
| C  | 4.261358  | 1.724941  | 0.146417  |
| N  | 3.048321  | 2.558514  | 0.195789  |
| S  | 3.110373  | 4.050900  | 1.070029  |
| O  | 3.662528  | 3.667388  | 2.398762  |
| O  | -0.051131 | 0.012666  | -1.159674 |
| C  | 0.045573  | -1.976772 | 1.744877  |
| O  | 0.068346  | -3.132514 | 1.604806  |
| N  | 0.497925  | 2.143987  | 2.406274  |
| C  | 1.061829  | 2.389622  | 3.539759  |
| C  | 1.011734  | 1.324665  | 4.535029  |
| N  | 0.441662  | 0.217295  | 4.178179  |
| C  | -2.039582 | 0.942099  | 1.243245  |
| C  | -2.143214 | 0.506743  | 2.582998  |
| C  | -2.030978 | -0.889411 | 2.808807  |
| O  | 2.782379  | -0.960550 | 0.116646  |
| O  | 3.949177  | 5.009637  | 0.306299  |
| O  | 1.655189  | 4.426240  | 1.108041  |
| H  | 5.174318  | 2.326281  | 0.258223  |
| H  | 4.289666  | 1.255359  | -0.842554 |
| H  | 4.299236  | 1.063513  | 2.207627  |



Supplementary Material (ESI) for *Dalton Transactions*  
This journal is © The Royal Society of Chemistry 2008

|   |           |           |           |
|---|-----------|-----------|-----------|
| H | 5.109766  | -0.037985 | 1.053597  |
| H | 0.664017  | 2.919985  | 1.740203  |
| H | 1.599730  | 3.317067  | 3.729843  |
| H | 1.445743  | 1.473614  | 5.524895  |
| H | 0.444618  | -0.506808 | 4.894368  |
| H | 2.707403  | 2.783421  | -0.734825 |
| H | -2.474333 | -1.573009 | 2.088982  |
| H | -1.990831 | -1.262949 | 3.829382  |
| H | -2.119513 | 1.214878  | 3.406083  |
| H | -2.467165 | 0.325121  | 0.457584  |
| H | -1.975884 | 2.003769  | 1.023769  |

**TS1'B-s**

|    |           |           |           |
|----|-----------|-----------|-----------|
| C  | 0.000000  | 0.000000  | 0.000000  |
| Mo | 0.000000  | 0.000000  | 1.991808  |
| C  | 1.961089  | 0.000000  | 1.729160  |
| O  | 3.119071  | -0.005494 | 1.580677  |
| O  | 0.008793  | 0.013496  | -1.162841 |
| C  | 0.919694  | 1.966469  | 2.847077  |
| C  | -0.468048 | 2.115506  | 2.564119  |
| C  | -0.851812 | 2.077898  | 1.207139  |
| O  | 0.560344  | -2.244585 | 2.218051  |
| C  | -0.488350 | -3.014083 | 1.459521  |
| O  | -1.294441 | -2.171659 | 0.910423  |
| N  | -2.167699 | -0.368590 | 2.453151  |
| C  | -2.522038 | -0.711863 | 3.642936  |
| C  | -1.455796 | -0.698146 | 4.644302  |
| N  | -0.278348 | -0.384985 | 4.217938  |
| C  | 0.208326  | -4.140853 | 0.631528  |
| C  | -0.087936 | -5.133912 | 1.771637  |
| N  | -1.032840 | -4.161708 | 2.382497  |
| S  | -1.086870 | -4.111208 | 4.092139  |
| O  | -1.222245 | -5.516986 | 4.527019  |
| O  | -2.245256 | -3.228596 | 4.438342  |
| O  | 0.222414  | -3.472777 | 4.531537  |
| H  | 0.614520  | -2.607394 | 3.147277  |
| H  | 1.242331  | 1.898248  | 3.882801  |
| H  | 1.639712  | 2.435671  | 2.180559  |
| H  | -0.193753 | 2.505394  | 0.455250  |
| H  | -1.906247 | 2.059308  | 0.946166  |
| H  | -1.208056 | 2.104167  | 3.359028  |
| H  | -2.854685 | -0.554974 | 1.726217  |
| H  | -3.503139 | -1.102830 | 3.897582  |
| H  | -1.658916 | -1.013657 | 5.664172  |
| H  | 0.450846  | -0.496079 | 4.919890  |
| H  | -0.355256 | -4.336342 | -0.283918 |
| H  | 1.260772  | -3.956724 | 0.402536  |
| H  | -0.570892 | -6.078468 | 1.501909  |
| H  | 0.789197  | -5.345216 | 2.396434  |

**M1'B-s**

|    |           |           |           |
|----|-----------|-----------|-----------|
| C  | 0.000000  | 0.000000  | 0.000000  |
| Mo | 0.000000  | 0.000000  | 1.982580  |
| C  | 1.968365  | 0.000000  | 1.725700  |
| O  | 3.119593  | 0.004421  | 1.548541  |
| O  | 0.004060  | -0.005544 | -1.168056 |
| C  | 0.888152  | 2.036961  | 2.736919  |
| C  | -0.518108 | 2.128128  | 2.545023  |
| C  | -0.973778 | 2.038868  | 1.209792  |
| O  | 0.084316  | -2.084644 | 1.859510  |
| C  | 0.548995  | -3.093014 | 2.600485  |

Supplementary Material (ESI) for *Dalton Transactions*  
This journal is © The Royal Society of Chemistry 2008

|   |           |           |          |
|---|-----------|-----------|----------|
| O | 1.383994  | -2.650658 | 3.669721 |
| N | -2.179477 | -0.418022 | 2.469246 |
| C | -2.465694 | -0.788000 | 3.670115 |
| C | -1.361607 | -0.773982 | 4.636356 |
| N | -0.220170 | -0.385168 | 4.182834 |
| C | 1.219685  | -4.272310 | 1.827321 |
| C | 0.398493  | -5.254578 | 2.686044 |
| N | -0.497243 | -4.137426 | 3.076888 |
| S | -1.226961 | -4.173320 | 4.625481 |
| O | -1.601405 | -5.586636 | 4.843515 |
| O | -2.389778 | -3.229445 | 4.541759 |
| O | -0.188887 | -3.653281 | 5.599026 |
| H | 1.018008  | -3.019380 | 4.508622 |
| H | 1.284142  | 1.999750  | 3.748830 |
| H | 1.545919  | 2.506667  | 2.008846 |
| H | -0.378937 | 2.483304  | 0.415916 |
| H | -2.040091 | 1.977342  | 1.007794 |
| H | -1.207976 | 2.116362  | 3.383736 |
| H | -2.955476 | -0.497061 | 1.814850 |
| H | -3.450275 | -1.124957 | 3.982684 |
| H | -1.516783 | -1.143685 | 5.645571 |
| H | 0.550250  | -0.492592 | 4.839506 |
| H | 0.922943  | -4.264117 | 0.776035 |
| H | 2.306917  | -4.314158 | 1.926575 |
| H | -0.128423 | -6.063507 | 2.170729 |
| H | 0.970624  | -5.674991 | 3.523286 |

**TS2'B1-s**

|    |           |           |           |
|----|-----------|-----------|-----------|
| C  | 0.000000  | 0.000000  | 0.000000  |
| O  | 0.000000  | 0.000000  | 1.166710  |
| Mo | 0.019456  | 0.000000  | -1.985500 |
| N  | 0.220212  | 0.374275  | -4.191744 |
| C  | -0.192796 | 1.491271  | -4.685589 |
| C  | -0.787611 | 2.431334  | -3.725338 |
| N  | -0.853891 | 2.028762  | -2.501099 |
| C  | 1.134060  | -1.619370 | -1.717890 |
| O  | 1.794129  | -2.563346 | -1.544281 |
| C  | -1.146165 | -1.883143 | -2.773093 |
| C  | -2.013831 | -0.779045 | -2.567646 |
| C  | -2.199239 | -0.366315 | -1.227583 |
| O  | 1.810932  | 1.128908  | -1.769325 |
| C  | 2.777516  | 1.452314  | -2.548069 |
| C  | 3.988206  | 2.147114  | -1.907324 |
| C  | 4.097170  | 3.334833  | -2.865199 |
| N  | 2.677650  | 3.375637  | -3.282190 |
| S  | 2.456178  | 3.592966  | -4.899978 |
| O  | 2.885042  | 2.264132  | -5.575403 |
| O  | 2.990009  | 0.704181  | -3.642560 |
| O  | 3.250580  | 4.729651  | -5.428342 |
| O  | 0.965345  | 3.766376  | -5.078208 |
| H  | 3.042157  | 1.309485  | -4.506343 |
| H  | -0.883494 | -2.171822 | -3.787430 |
| H  | -1.153506 | -2.698135 | -2.053297 |
| H  | -2.236168 | -1.117099 | -0.442501 |
| H  | -2.751968 | 0.545981  | -1.019251 |
| H  | -2.385875 | -0.188179 | -3.398959 |
| H  | -1.205336 | 2.732207  | -1.854470 |
| H  | -1.107347 | 3.412941  | -4.060244 |
| H  | -0.063740 | 1.782692  | -5.722112 |
| H  | 0.732469  | -0.207094 | -4.851877 |
| H  | 3.708764  | 2.456994  | -0.896690 |

Supplementary Material (ESI) for *Dalton Transactions*  
This journal is © The Royal Society of Chemistry 2008

|   |          |          |           |
|---|----------|----------|-----------|
| H | 4.860429 | 1.482443 | -1.856404 |
| H | 4.427736 | 4.270296 | -2.391856 |
| H | 4.793733 | 3.115724 | -3.686378 |

**M2'B1-s**

|    |           |           |           |
|----|-----------|-----------|-----------|
| C  | 0.000000  | 0.000000  | 0.000000  |
| O  | 0.000000  | 0.000000  | 1.167535  |
| Mo | 0.021313  | 0.000000  | -1.981644 |
| N  | 0.334847  | 0.339148  | -4.184618 |
| C  | 0.330607  | 1.548397  | -4.632877 |
| C  | -0.029709 | 2.599033  | -3.671329 |
| N  | -0.357345 | 2.199809  | -2.485987 |
| C  | 0.750215  | -1.820961 | -1.705396 |
| O  | 1.186147  | -2.886462 | -1.524359 |
| C  | -1.529960 | -1.575481 | -2.774834 |
| C  | -2.133951 | -0.305732 | -2.578201 |
| C  | -2.235868 | 0.149419  | -1.244922 |
| O  | 1.991144  | 0.741369  | -1.851088 |
| C  | 2.894718  | 1.140873  | -2.691508 |
| C  | 3.577390  | 2.453786  | -2.297279 |
| C  | 3.830601  | 3.356907  | -3.509236 |
| N  | 2.567960  | 3.575109  | -4.236535 |
| S  | 2.711814  | 3.560518  | -5.817932 |
| O  | 3.097525  | 1.962533  | -6.234921 |
| O  | 3.219061  | 0.537141  | -3.729393 |
| O  | 3.827440  | 4.351514  | -6.380282 |
| O  | 1.375478  | 3.773935  | -6.426761 |
| H  | 3.247409  | 1.462636  | -5.398388 |
| H  | -1.333918 | -1.918346 | -3.787340 |
| H  | -1.722627 | -2.365823 | -2.053479 |
| H  | -2.440103 | -0.565816 | -0.452770 |
| H  | -2.570202 | 1.164731  | -1.049700 |
| H  | -2.350891 | 0.350398  | -3.415504 |
| H  | -0.569967 | 2.958597  | -1.841063 |
| H  | -0.007557 | 3.636074  | -3.993033 |
| H  | 0.598648  | 1.831605  | -5.647591 |
| H  | 0.673548  | -0.342105 | -4.861570 |
| H  | 2.947848  | 2.959980  | -1.559472 |
| H  | 4.531540  | 2.215628  | -1.805341 |
| H  | 4.242979  | 4.316288  | -3.157537 |
| H  | 4.611323  | 2.899213  | -4.131567 |

**TS3'B1-s**

|    |           |           |           |
|----|-----------|-----------|-----------|
| C  | 0.000000  | 0.000000  | 0.000000  |
| Mo | 0.000000  | 0.000000  | 1.983227  |
| O  | 2.112640  | 0.000000  | 1.904566  |
| C  | 2.963363  | 0.480367  | 2.762681  |
| O  | 2.713018  | 1.363783  | 3.598262  |
| O  | 0.010544  | 0.009613  | -1.167042 |
| N  | 0.451303  | -0.180635 | 4.173042  |
| C  | 0.959158  | -1.291400 | 4.590169  |
| C  | 0.982185  | -2.401027 | 3.633131  |
| N  | 0.481076  | -2.158835 | 2.467896  |
| C  | 0.030012  | 1.971694  | 1.721657  |
| O  | 0.041580  | 3.121482  | 1.542590  |
| C  | -2.020819 | 0.896139  | 2.761187  |
| C  | -2.125456 | -0.506757 | 2.565861  |
| C  | -2.040579 | -0.966230 | 1.232712  |
| C  | 4.349198  | -0.162977 | 2.709559  |
| C  | 4.731645  | -0.798542 | 4.063466  |
| N  | 3.858400  | -1.892540 | 4.499778  |

Supplementary Material (ESI) for *Dalton Transactions*  
This journal is © The Royal Society of Chemistry 2008

|   |           |           |          |
|---|-----------|-----------|----------|
| S | 4.326865  | -3.482945 | 4.162143 |
| O | 3.390173  | -4.229607 | 3.282415 |
| O | 4.014872  | -3.810885 | 5.703536 |
| O | 5.758530  | -3.620978 | 3.816863 |
| H | 3.871648  | -2.610868 | 5.682902 |
| H | -1.970184 | 1.289352  | 3.773234 |
| H | -2.480500 | 1.561503  | 2.034478 |
| H | -2.480578 | -0.370140 | 0.437806 |
| H | -1.978763 | -2.032624 | 1.034141 |
| H | -2.095954 | -1.197375 | 3.403097 |
| H | 0.586982  | -2.938554 | 1.820361 |
| H | 1.452381  | -3.347669 | 3.889961 |
| H | 1.396094  | -1.421447 | 5.576390 |
| H | 0.560083  | 0.601345  | 4.815621 |
| H | 4.383976  | -0.908687 | 1.910777 |
| H | 5.081386  | 0.623762  | 2.481168 |
| H | 5.782004  | -1.121996 | 4.017418 |
| H | 4.656377  | -0.018571 | 4.830365 |

**TS2'B2-s**

|    |           |           |           |
|----|-----------|-----------|-----------|
| C  | 0.000000  | 0.000000  | 0.000000  |
| Mo | 0.000000  | 0.000000  | 1.975967  |
| C  | 1.955668  | 0.000000  | 1.676913  |
| O  | 3.100425  | 0.052452  | 1.464315  |
| O  | 0.016263  | -0.005552 | -1.169393 |
| C  | 0.878181  | 2.026798  | 2.786876  |
| C  | -0.512940 | 2.136268  | 2.537657  |
| C  | -0.921677 | 2.052493  | 1.183554  |
| O  | -0.122507 | -2.039045 | 2.013885  |
| C  | 0.651753  | -3.144063 | 2.131915  |
| O  | 1.945054  | -2.856785 | 2.651483  |
| N  | -2.189960 | -0.432207 | 2.522242  |
| C  | -2.375316 | -1.000250 | 3.663818  |
| C  | -1.256858 | -0.974068 | 4.617217  |
| N  | -0.169325 | -0.416189 | 4.215923  |
| C  | 0.699998  | -4.123642 | 0.909255  |
| C  | -0.035089 | -5.188046 | 1.780639  |
| N  | -0.009408 | -4.231570 | 2.878473  |
| S  | -0.518297 | -4.264976 | 4.475061  |
| O  | -0.562997 | -5.699809 | 4.836190  |
| O  | -1.864765 | -3.595912 | 4.572667  |
| O  | 0.535290  | -3.435628 | 5.158249  |
| H  | 1.847258  | -2.948376 | 3.618726  |
| H  | 1.233247  | 1.974025  | 3.812895  |
| H  | 1.575302  | 2.477596  | 2.084631  |
| H  | -0.298986 | 2.504348  | 0.415442  |
| H  | -1.981953 | 2.006593  | 0.946959  |
| H  | -1.235162 | 2.114542  | 3.348175  |
| H  | -2.986121 | -0.505769 | 1.891414  |
| H  | -3.298830 | -1.498398 | 3.952517  |
| H  | -1.373697 | -1.441006 | 5.590135  |
| H  | 0.588561  | -0.489445 | 4.892993  |
| H  | 0.127084  | -3.756849 | 0.055193  |
| H  | 1.714797  | -4.396824 | 0.612452  |
| H  | -1.043158 | -5.455172 | 1.431805  |
| H  | 0.529096  | -6.108730 | 1.978069  |

**M2'B2-s**

|    |          |          |           |
|----|----------|----------|-----------|
| C  | 0.000000 | 0.000000 | 0.000000  |
| O  | 0.000000 | 0.000000 | 1.169914  |
| Mo | 0.029635 | 0.000000 | -1.969864 |

Supplementary Material (ESI) for *Dalton Transactions*  
This journal is © The Royal Society of Chemistry 2008

|   |           |           |           |
|---|-----------|-----------|-----------|
| C | 0.868750  | -2.065700 | -2.781913 |
| C | -0.527603 | -2.121469 | -2.558647 |
| C | -0.972616 | -2.023184 | -1.216653 |
| N | -0.087411 | 0.434420  | -4.241013 |
| C | -1.146377 | 1.042684  | -4.638951 |
| C | -2.296164 | 1.059843  | -3.717935 |
| N | -2.159528 | 0.463982  | -2.585863 |
| C | 1.972756  | -0.074668 | -1.628831 |
| O | 3.115585  | -0.170990 | -1.411593 |
| O | -0.060963 | 2.023678  | -2.070584 |
| C | 0.612885  | 3.142715  | -1.708834 |
| O | 2.013046  | 2.980200  | -1.714595 |
| C | 0.073727  | 3.867402  | -0.440844 |
| C | -0.671604 | 4.832960  | -1.400208 |
| N | 0.183416  | 4.348708  | -2.499471 |
| S | -0.331784 | 4.279198  | -4.129386 |
| O | 0.767618  | 3.508060  | -4.781252 |
| O | -0.467097 | 5.698259  | -4.529669 |
| O | -1.661678 | 3.558041  | -4.208503 |
| H | -2.978411 | 0.530843  | -1.984321 |
| H | -3.206744 | 1.567259  | -4.030745 |
| H | -1.230072 | 1.549192  | -5.596102 |
| H | 0.690343  | 0.523763  | -4.892716 |
| H | 0.868927  | 4.348432  | 0.133012  |
| H | -0.547124 | 3.240629  | 0.202291  |
| H | -0.574119 | 5.907481  | -1.211900 |
| H | -1.731965 | 4.574891  | -1.528279 |
| H | 2.260013  | 2.918391  | -2.651400 |
| H | -2.037841 | -1.944480 | -1.013562 |
| H | -0.389565 | -2.493750 | -0.429156 |
| H | -1.228412 | -2.060768 | -3.385946 |
| H | 1.244346  | -2.019020 | -3.800680 |
| H | 1.539733  | -2.532050 | -2.065277 |

**TS3'B2-s**

|    |           |           |           |
|----|-----------|-----------|-----------|
| C  | 0.000000  | 0.000000  | 0.000000  |
| Mo | 0.000000  | 0.000000  | 1.981130  |
| N  | 0.459859  | 0.000000  | 4.185975  |
| C  | 1.247809  | -0.912192 | 4.651900  |
| C  | 1.748297  | -1.894100 | 3.682211  |
| N  | 1.320383  | -1.786172 | 2.468121  |
| O  | 0.009776  | 0.013679  | -1.168214 |
| C  | -0.866738 | 1.762531  | 1.703339  |
| O  | -1.394918 | 2.781610  | 1.504276  |
| O  | 1.951982  | 0.913543  | 1.856168  |
| C  | 2.512839  | 1.902797  | 2.395021  |
| O  | 1.724044  | 2.845096  | 2.983774  |
| C  | -1.423769 | -1.708224 | 1.185001  |
| C  | -1.680743 | -1.376772 | 2.537823  |
| C  | -2.202580 | -0.080878 | 2.778411  |
| C  | 3.921763  | 2.291415  | 1.925270  |
| C  | 4.750745  | 1.661797  | 3.054382  |
| N  | 3.746129  | 1.743722  | 4.113419  |
| S  | 3.881213  | 0.643838  | 5.337100  |
| O  | 5.241040  | 0.718708  | 5.942306  |
| O  | 3.682173  | -0.765873 | 4.727205  |
| O  | 2.748522  | 0.955341  | 6.266955  |
| H  | 1.736457  | -2.451493 | 1.820058  |
| H  | 2.448575  | -2.656693 | 4.011560  |
| H  | 1.550533  | -0.955822 | 5.691428  |
| H  | 0.240030  | 0.714955  | 4.877864  |

Supplementary Material (ESI) for *Dalton Transactions*  
This journal is © The Royal Society of Chemistry 2008

|   |           |           |          |
|---|-----------|-----------|----------|
| H | 4.008687  | 3.382858  | 1.908391 |
| H | 4.118347  | 1.897253  | 0.922571 |
| H | 5.687994  | 2.196188  | 3.275860 |
| H | 5.007111  | 0.623963  | 2.790172 |
| H | 2.266430  | 3.101588  | 3.761795 |
| H | -0.909906 | -2.636747 | 0.950807 |
| H | -2.100068 | -1.348613 | 0.414081 |
| H | -1.346824 | -2.013507 | 3.351079 |
| H | -2.300822 | 0.271528  | 3.801359 |
| H | -2.917788 | 0.339219  | 2.075710 |

**P'-s**

|    |           |           |           |
|----|-----------|-----------|-----------|
| C  | 0.000000  | 0.000000  | 0.000000  |
| O  | 0.000000  | 0.000000  | 1.167124  |
| Mo | 0.028876  | 0.000000  | -1.983919 |
| C  | -1.740878 | -1.297697 | -2.813237 |
| C  | -2.141503 | 0.046666  | -2.601909 |
| C  | -2.175009 | 0.487783  | -1.257915 |
| N  | 0.482251  | 0.289542  | -4.158801 |
| C  | 0.642188  | 1.489268  | -4.608357 |
| C  | 0.319140  | 2.567823  | -3.667059 |
| N  | -0.021472 | 2.202141  | -2.475191 |
| C  | 0.447756  | -1.929033 | -1.718741 |
| O  | 0.677574  | -3.053506 | -1.529956 |
| O  | 2.130408  | 0.401489  | -1.833667 |
| C  | 3.050767  | -0.107276 | -2.593268 |
| C  | 4.445437  | 0.495410  | -2.404092 |
| C  | 4.581531  | 1.833433  | -3.156592 |
| N  | 4.386878  | 1.647565  | -4.601330 |
| S  | 3.668556  | 2.956295  | -5.471342 |
| O  | 3.039152  | 2.252909  | -6.628994 |
| O  | 2.862283  | -0.975371 | -3.463690 |
| O  | 4.764392  | 3.895145  | -5.789500 |
| O  | 2.636304  | 3.566462  | -4.552409 |
| H  | -0.194803 | 2.979229  | -1.840210 |
| H  | 0.408751  | 3.601984  | -3.984940 |
| H  | 1.067142  | 1.723644  | -5.585146 |
| H  | 0.830285  | -0.442828 | -4.775894 |
| H  | 5.182925  | -0.222639 | -2.776040 |
| H  | 4.625267  | 0.678426  | -1.339560 |
| H  | 5.584152  | 2.243299  | -2.980268 |
| H  | 3.851354  | 2.545817  | -2.752449 |
| H  | 3.837323  | 0.817284  | -4.811350 |
| H  | -2.355094 | 1.537593  | -1.041792 |
| H  | -2.495390 | -0.203356 | -0.482848 |
| H  | -2.251596 | 0.740336  | -3.429865 |
| H  | -1.582898 | -1.653355 | -3.827720 |
| H  | -2.060105 | -2.057582 | -2.104184 |

**3-formylamine-N-sulfonate azetidin-2-one**

|   |           |           |           |
|---|-----------|-----------|-----------|
| C | 0.000000  | 0.000000  | 0.000000  |
| C | 0.000000  | 0.000000  | 1.557377  |
| N | 1.262907  | 0.000000  | 2.264219  |
| C | 1.846910  | -1.105484 | 2.785693  |
| O | 1.433888  | -2.254682 | 2.673940  |
| N | -0.726138 | 1.284853  | 0.066753  |
| S | -0.991370 | 2.412904  | -1.310402 |
| O | -1.146455 | 1.428050  | -2.405717 |
| C | -0.620219 | 1.419076  | 1.424415  |
| O | -0.845857 | 2.296982  | 2.236568  |
| O | 0.263803  | 3.196485  | -1.350732 |

Supplementary Material (ESI) for *Dalton Transactions*  
This journal is © The Royal Society of Chemistry 2008

|   |           |           |           |
|---|-----------|-----------|-----------|
| O | -2.202001 | 3.156045  | -0.921540 |
| H | -0.562034 | -0.797902 | -0.490753 |
| H | 0.997629  | 0.091848  | -0.441130 |
| H | 1.672949  | 0.899768  | 2.481981  |
| H | 2.772809  | -0.865306 | 3.344630  |
| H | -0.664392 | -0.748873 | 1.994506  |

**TS1'B-sf**

|    |           |           |           |
|----|-----------|-----------|-----------|
| C  | 0.000000  | 0.000000  | 0.000000  |
| C  | 0.000000  | 0.000000  | 1.411271  |
| C  | 1.267518  | 0.000000  | 2.057449  |
| Mo | 0.872012  | -2.004504 | 0.924262  |
| O  | 1.649561  | -4.199628 | 1.263879  |
| C  | 0.964030  | -5.016435 | 0.250219  |
| O  | 0.269007  | -4.236899 | -0.524037 |
| N  | 0.067553  | -2.557507 | 2.984393  |
| C  | -1.130403 | -3.026942 | 3.074059  |
| C  | -1.885115 | -3.106806 | 1.820455  |
| N  | -1.280568 | -2.650246 | 0.780119  |
| C  | 1.398244  | -1.871744 | -0.990567 |
| O  | 1.703891  | -1.786977 | -2.109318 |
| C  | 2.817535  | -1.758602 | 1.200458  |
| O  | 3.962640  | -1.620019 | 1.371415  |
| C  | 1.977193  | -6.028724 | -0.413555 |
| C  | 1.370377  | -7.155073 | 0.449377  |
| N  | 0.281876  | -6.246303 | 0.901862  |
| S  | -0.196696 | -6.334814 | 2.543195  |
| O  | -0.280303 | -7.774665 | 2.851568  |
| N  | 1.720216  | -6.068707 | -1.835840 |
| C  | 2.451667  | -6.741579 | -2.744115 |
| O  | 3.397868  | -7.493150 | -2.505336 |
| O  | 0.885760  | -5.607599 | 3.326146  |
| O  | -1.493975 | -5.593229 | 2.629213  |
| H  | 0.771640  | 0.549324  | -0.532428 |
| H  | -0.935704 | -0.124992 | -0.537656 |
| H  | -0.917411 | -0.147477 | 1.973349  |
| H  | 2.072551  | 0.587790  | 1.622912  |
| H  | 1.309659  | -0.094661 | 3.139318  |
| H  | -1.730806 | -2.861525 | -0.107571 |
| H  | -2.844199 | -3.616801 | 1.793974  |
| H  | -1.557028 | -3.413192 | 3.995717  |
| H  | 0.593688  | -2.613773 | 3.854554  |
| H  | 2.042234  | -7.484642 | 1.249661  |
| H  | 0.996666  | -8.025463 | -0.096189 |
| H  | 3.030852  | -5.821324 | -0.214981 |
| H  | 1.512694  | -4.623538 | 2.162644  |
| H  | 1.003264  | -5.405750 | -2.129867 |
| H  | 2.106011  | -6.554703 | -3.781272 |

**M1'B-sf**

|    |           |           |           |
|----|-----------|-----------|-----------|
| C  | 0.000000  | 0.000000  | 0.000000  |
| O  | 0.000000  | 0.000000  | 1.165536  |
| Mo | 0.034226  | 0.000000  | -1.994675 |
| C  | -0.820820 | -1.793539 | -1.744408 |
| O  | -1.391208 | -2.788421 | -1.563893 |
| O  | 1.953200  | -0.858741 | -1.856512 |
| C  | 2.523540  | -2.008978 | -2.282205 |
| O  | 1.676976  | -3.125017 | -2.255432 |
| C  | -2.139078 | 0.052964  | -2.894737 |
| C  | -1.685383 | 1.363421  | -2.609805 |
| C  | -1.485717 | 1.676043  | -1.243155 |

Supplementary Material (ESI) for *Dalton Transactions*  
This journal is © The Royal Society of Chemistry 2008

|   |           |           |           |
|---|-----------|-----------|-----------|
| N | 0.622655  | -0.057707 | -4.131217 |
| C | 1.560769  | 0.745811  | -4.509515 |
| C | 1.895532  | 1.815998  | -3.579362 |
| N | 1.283080  | 1.803308  | -2.437331 |
| N | 3.319671  | -1.869693 | -3.588505 |
| S | 2.799947  | -2.467575 | -5.126955 |
| O | 3.044366  | -1.369089 | -6.102251 |
| C | 3.884967  | -2.339596 | -1.571362 |
| N | 4.276763  | -1.252182 | -0.700772 |
| C | 5.330651  | -1.260731 | 0.137383  |
| O | 6.171999  | -2.153182 | 0.242854  |
| C | 4.552852  | -2.404138 | -2.963929 |
| O | 1.313092  | -2.675030 | -4.893577 |
| O | 3.548444  | -3.713419 | -5.402765 |
| H | 1.553611  | 2.557025  | -1.807717 |
| H | 2.637064  | 2.570172  | -3.846448 |
| H | 2.125703  | 0.582693  | -5.426556 |
| H | 0.531171  | -0.889333 | -4.733689 |
| H | 3.873968  | -3.285722 | -1.027558 |
| H | 4.791450  | -3.424249 | -3.281358 |
| H | 5.427082  | -1.757945 | -3.096766 |
| H | 1.301295  | -3.213625 | -3.160596 |
| H | -1.027546 | 2.623275  | -0.969524 |
| H | -2.173543 | 1.268121  | -0.506962 |
| H | -1.340749 | 2.024466  | -3.399163 |
| H | -2.185752 | -0.287381 | -3.925068 |
| H | -2.858036 | -0.406920 | -2.221279 |
| H | 3.593658  | -0.498487 | -0.669871 |
| H | 5.380213  | -0.340400 | 0.755479  |

**TS2'B1-sf**

|    |           |           |           |
|----|-----------|-----------|-----------|
| C  | 0.000000  | 0.000000  | 0.000000  |
| O  | 0.000000  | 0.000000  | 1.167193  |
| Mo | 0.033207  | 0.000000  | -1.982695 |
| C  | -1.995407 | 0.981444  | -1.241562 |
| C  | -2.074300 | 0.533890  | -2.580777 |
| C  | -2.000285 | -0.869268 | -2.779967 |
| O  | 2.154772  | -0.128811 | -1.757041 |
| C  | 3.116999  | -0.472103 | -2.550657 |
| C  | 4.499675  | -0.732527 | -1.880298 |
| C  | 5.310119  | 0.239726  | -2.749266 |
| N  | 4.185820  | 1.109041  | -3.167720 |
| S  | 4.152277  | 1.482409  | -4.765890 |
| O  | 5.477115  | 1.878346  | -5.289893 |
| N  | 0.436929  | 0.208608  | -4.177725 |
| C  | 0.758752  | 1.362807  | -4.653710 |
| C  | 0.800325  | 2.463545  | -3.682815 |
| N  | 0.495892  | 2.161380  | -2.465455 |
| C  | 0.016063  | -1.973218 | -1.731930 |
| O  | 0.015535  | -3.124520 | -1.566759 |
| O  | 2.856746  | -1.162026 | -3.648305 |
| N  | 4.433102  | -0.375308 | -0.470846 |
| C  | 5.332201  | -0.751687 | 0.459454  |
| O  | 6.361359  | -1.396545 | 0.258283  |
| O  | 3.084809  | 2.529302  | -4.926882 |
| O  | 3.661301  | 0.177058  | -5.487655 |
| H  | 3.254466  | -0.616366 | -4.564506 |
| H  | -1.946485 | -1.262432 | -3.791646 |
| H  | -2.477932 | -1.526499 | -2.057550 |
| H  | -2.463137 | 0.390590  | -0.458282 |
| H  | -1.922974 | 2.045846  | -1.034923 |



Supplementary Material (ESI) for *Dalton Transactions*  
This journal is © The Royal Society of Chemistry 2008

|   |           |           |           |
|---|-----------|-----------|-----------|
| H | -2.035633 | 1.228643  | -3.414285 |
| H | 0.598413  | 2.934328  | -1.810750 |
| H | 1.108751  | 3.454183  | -4.002167 |
| H | 1.058633  | 1.533103  | -5.682192 |
| H | 0.532190  | -0.557388 | -4.841579 |
| H | 4.800095  | -1.781310 | -1.968583 |
| H | 6.083252  | 0.781030  | -2.192170 |
| H | 5.796390  | -0.295915 | -3.574409 |
| H | 3.579224  | 0.091076  | -0.185618 |
| H | 5.048867  | -0.410432 | 1.475829  |

**M2'B1-sf**

|    |           |           |           |
|----|-----------|-----------|-----------|
| C  | 0.000000  | 0.000000  | 0.000000  |
| Mo | 0.000000  | 0.000000  | 1.984366  |
| O  | 2.127926  | 0.000000  | 1.872291  |
| C  | 3.109464  | 0.236961  | 2.681169  |
| O  | 3.068003  | 0.937665  | 3.703170  |
| O  | 0.015838  | 0.002450  | -1.166943 |
| N  | 0.421394  | -0.192011 | 4.170510  |
| C  | 0.903542  | -1.306415 | 4.603877  |
| C  | 0.977992  | -2.407704 | 3.634896  |
| N  | 0.480232  | -2.176212 | 2.464313  |
| C  | 0.027890  | 1.965798  | 1.722578  |
| O  | 0.052346  | 3.116638  | 1.549193  |
| C  | -2.018736 | 0.899657  | 2.770406  |
| C  | -2.120473 | -0.500000 | 2.559416  |
| C  | -2.038110 | -0.940870 | 1.218860  |
| C  | 4.436054  | -0.450230 | 2.298385  |
| N  | 4.270866  | -1.207933 | 1.060803  |
| C  | 5.264550  | -1.444738 | 0.179026  |
| O  | 6.450516  | -1.152628 | 0.324364  |
| C  | 4.939373  | -1.316190 | 3.478566  |
| N  | 3.843686  | -2.094143 | 4.080294  |
| S  | 3.908771  | -2.175089 | 5.661094  |
| O  | 2.799017  | -3.025716 | 6.157408  |
| O  | 3.482334  | -0.617994 | 6.226906  |
| O  | 5.241451  | -2.407722 | 6.253541  |
| H  | 3.466452  | -0.019915 | 5.449255  |
| H  | -1.965163 | 1.282312  | 3.786126  |
| H  | -2.476233 | 1.573357  | 2.050443  |
| H  | -2.480665 | -0.333318 | 0.434422  |
| H  | -1.982100 | -2.004977 | 1.006704  |
| H  | -2.094886 | -1.200857 | 3.387958  |
| H  | 0.570984  | -2.959030 | 1.819090  |
| H  | 1.434238  | -3.344436 | 3.943797  |
| H  | 1.275453  | -1.462514 | 5.612218  |
| H  | 0.467916  | 0.563595  | 4.851784  |
| H  | 5.185545  | 0.327992  | 2.112450  |
| H  | 5.727163  | -1.975932 | 3.092269  |
| H  | 5.426432  | -0.636866 | 4.190165  |
| H  | 3.312817  | -1.361608 | 0.772577  |
| H  | 4.899243  | -1.957329 | -0.733900 |

**TS3'B1-sf**

|    |           |           |           |
|----|-----------|-----------|-----------|
| C  | 0.000000  | 0.000000  | 0.000000  |
| O  | 0.000000  | 0.000000  | 1.165529  |
| Mo | 0.023560  | 0.000000  | -1.987200 |
| C  | -2.211854 | -0.361101 | -1.262138 |
| C  | -2.010683 | -0.777530 | -2.596936 |
| C  | -1.130589 | -1.874621 | -2.791587 |
| O  | 1.788394  | 1.176235  | -1.874137 |

Supplementary Material (ESI) for *Dalton Transactions*  
This journal is © The Royal Society of Chemistry 2008

|   |           |           |           |
|---|-----------|-----------|-----------|
| C | 2.782536  | 1.257579  | -2.697794 |
| C | 3.651349  | 2.520863  | -2.547179 |
| N | 3.345827  | 3.258122  | -1.331491 |
| C | 4.280463  | 3.728931  | -0.477946 |
| O | 5.498701  | 3.579763  | -0.579086 |
| N | 0.331734  | 0.410338  | -4.164342 |
| C | 0.112049  | 1.610538  | -4.583336 |
| C | -0.519122 | 2.530817  | -3.636464 |
| N | -0.789577 | 2.051709  | -2.469182 |
| C | 1.151204  | -1.617204 | -1.715964 |
| O | 1.805611  | -2.561543 | -1.534822 |
| O | 3.054166  | 0.451362  | -3.599470 |
| C | 3.489782  | 3.421103  | -3.804884 |
| N | 2.117269  | 3.847400  | -4.055101 |
| S | 1.523599  | 5.249112  | -3.340258 |
| O | 2.542003  | 6.295118  | -3.121104 |
| O | 0.609666  | 5.008102  | -2.190107 |
| O | 0.686429  | 5.461744  | -4.695557 |
| H | 1.411048  | 4.531782  | -5.004015 |
| H | -0.856666 | -2.164359 | -3.802692 |
| H | -1.140907 | -2.687405 | -2.069682 |
| H | -2.245387 | -1.109987 | -0.475567 |
| H | -2.765150 | 0.551738  | -1.060371 |
| H | -2.368507 | -0.184797 | -3.433591 |
| H | -1.133434 | 2.763908  | -1.825769 |
| H | -0.700320 | 3.566150  | -3.914570 |
| H | 0.420356  | 1.967626  | -5.563685 |
| H | 0.891485  | -0.162850 | -4.792465 |
| H | 4.698001  | 2.210748  | -2.481781 |
| H | 4.173562  | 4.276144  | -3.701345 |
| H | 3.806562  | 2.831351  | -4.671667 |
| H | 2.369728  | 3.441431  | -1.129758 |
| H | 3.830163  | 4.283438  | 0.366782  |

**TS2'B2-sf**

|    |           |           |           |
|----|-----------|-----------|-----------|
| C  | 0.000000  | 0.000000  | 0.000000  |
| O  | 0.000000  | 0.000000  | 1.170154  |
| Mo | 0.040868  | 0.000000  | -1.973620 |
| C  | -1.902527 | -1.035429 | -2.775548 |
| C  | -2.104974 | 0.354739  | -2.570007 |
| C  | -2.068032 | 0.794860  | -1.224151 |
| O  | 2.141448  | 0.196646  | -1.856524 |
| C  | 3.217442  | -0.459742 | -2.349495 |
| O  | 2.869177  | -1.665537 | -3.005757 |
| C  | 4.383083  | -0.580477 | -1.282612 |
| N  | 3.932951  | -0.267451 | 0.049119  |
| C  | 4.576976  | -0.576800 | 1.192949  |
| O  | 5.685221  | -1.105075 | 1.284104  |
| C  | 5.158164  | 0.512362  | -2.080041 |
| N  | 4.181711  | 0.336030  | -3.149303 |
| S  | 4.050907  | 1.006862  | -4.680177 |
| O  | 3.294087  | -0.065458 | -5.413756 |
| O  | 3.240024  | 2.277160  | -4.603107 |
| O  | 5.441574  | 1.248090  | -5.115261 |
| N  | 0.325926  | 2.205359  | -2.463855 |
| C  | 0.752980  | 2.492057  | -3.645290 |
| C  | 0.801960  | 1.392064  | -4.615699 |
| N  | 0.453210  | 0.231048  | -4.181478 |
| C  | 0.185951  | -1.965201 | -1.708348 |
| O  | 0.234402  | -3.111201 | -1.517846 |
| H  | 5.130078  | 1.496748  | -1.590696 |

Supplementary Material (ESI) for *Dalton Transactions*  
This journal is © The Royal Society of Chemistry 2008

|   |           |           |           |
|---|-----------|-----------|-----------|
| H | 6.186061  | 0.268138  | -2.365952 |
| H | 4.881615  | -1.549714 | -1.305022 |
| H | 3.000837  | 0.139135  | 0.075085  |
| H | 3.990857  | -0.295629 | 2.090396  |
| H | 3.067745  | -1.513890 | -3.949111 |
| H | 0.355102  | 2.987190  | -1.811954 |
| H | 1.090876  | 3.481631  | -3.944517 |
| H | 1.156637  | 1.573989  | -5.624402 |
| H | 0.598239  | -0.508994 | -4.866691 |
| H | -2.090241 | 1.859919  | -1.007612 |
| H | -2.488694 | 0.159447  | -0.449088 |
| H | -2.133236 | 1.055707  | -3.398620 |
| H | -1.810973 | -1.416413 | -3.789401 |
| H | -2.324063 | -1.737441 | -2.060121 |

**M2'B2-sf**

|    |           |           |           |
|----|-----------|-----------|-----------|
| C  | 0.000000  | 0.000000  | 0.000000  |
| Mo | 0.000000  | 0.000000  | 1.974770  |
| O  | 2.085118  | 0.000000  | 2.015406  |
| C  | 3.106428  | 0.889635  | 2.002775  |
| N  | 4.208811  | 0.618138  | 2.981192  |
| C  | 5.046255  | -0.057310 | 1.977283  |
| C  | 4.165387  | 0.593458  | 0.874463  |
| N  | 3.645237  | -0.249675 | -0.171486 |
| C  | 4.140321  | -0.348476 | -1.423382 |
| O  | 5.162563  | 0.190498  | -1.845412 |
| O  | 0.001042  | 0.009334  | -1.169730 |
| C  | -2.101284 | 0.728233  | 2.764900  |
| C  | -2.093148 | -0.665589 | 2.518721  |
| C  | -1.960422 | -1.069005 | 1.165872  |
| N  | 0.387118  | -0.121748 | 4.212951  |
| C  | 0.952824  | -1.188301 | 4.654587  |
| C  | 1.073641  | -2.309676 | 3.712737  |
| N  | 0.565067  | -2.155202 | 2.539850  |
| C  | -0.158478 | 1.954914  | 1.681828  |
| O  | -0.322366 | 3.091476  | 1.488721  |
| O  | 2.689501  | 2.234880  | 2.067583  |
| S  | 3.994227  | 0.068839  | 4.579064  |
| O  | 3.474290  | -1.350492 | 4.552689  |
| O  | 2.978601  | 1.033673  | 5.103578  |
| O  | 5.342127  | 0.147128  | 5.179187  |
| H  | 0.705548  | -2.952459 | 1.921819  |
| H  | 1.591378  | -3.212954 | 4.032184  |
| H  | 1.348242  | -1.287818 | 5.660004  |
| H  | 0.432204  | 0.650214  | 4.876411  |
| H  | 4.605699  | 1.495961  | 0.451617  |
| H  | 6.100852  | 0.230661  | 2.012485  |
| H  | 4.950878  | -1.151823 | 1.984075  |
| H  | 2.708312  | 2.468926  | 3.009497  |
| H  | -1.827352 | -2.122914 | 0.934343  |
| H  | -2.454791 | -0.488856 | 0.391020  |
| H  | -2.024109 | -1.381869 | 3.331700  |
| H  | -2.083906 | 1.089490  | 3.789678  |
| H  | -2.592473 | 1.387116  | 2.053509  |
| H  | 2.771104  | -0.708405 | 0.066222  |
| H  | 3.514246  | -0.995815 | -2.068835 |

**TS3'B2-sf**

|    |          |          |           |
|----|----------|----------|-----------|
| C  | 0.000000 | 0.000000 | 0.000000  |
| O  | 0.000000 | 0.000000 | 1.168124  |
| Mo | 0.039263 | 0.000000 | -1.979646 |

Supplementary Material (ESI) for *Dalton Transactions*  
This journal is © The Royal Society of Chemistry 2008

|   |           |           |           |
|---|-----------|-----------|-----------|
| C | -1.984092 | -0.824776 | -2.816463 |
| C | -2.038364 | 0.573545  | -2.587018 |
| C | -1.967868 | 0.991218  | -1.235886 |
| N | 0.514641  | 0.199076  | -4.172107 |
| C | 0.888925  | 1.352247  | -4.620821 |
| C | 0.918001  | 2.447660  | -3.644754 |
| N | 0.548622  | 2.162564  | -2.438031 |
| C | -0.038554 | -1.965961 | -1.710477 |
| O | -0.094994 | -3.112810 | -1.520127 |
| O | 2.212308  | -0.101711 | -1.811881 |
| C | 3.098386  | -0.749616 | -2.414864 |
| C | 4.566825  | -0.589498 | -1.949942 |
| C | 5.096221  | 0.397483  | -3.003611 |
| N | 4.266064  | 0.008037  | -4.134568 |
| S | 3.974545  | 1.181544  | -5.251194 |
| O | 3.118502  | 0.524807  | -6.289333 |
| O | 2.761471  | -1.813702 | -3.169004 |
| N | 4.638878  | -0.146156 | -0.568429 |
| C | 5.372994  | -0.739728 | 0.404085  |
| O | 6.138734  | -1.687643 | 0.261158  |
| O | 5.252606  | 1.761939  | -5.748465 |
| O | 3.166890  | 2.301901  | -4.542080 |
| H | 0.621334  | 2.942250  | -1.788136 |
| H | 1.226248  | 3.438708  | -3.963729 |
| H | 1.198947  | 1.514477  | -5.647699 |
| H | 0.611826  | -0.543586 | -4.862550 |
| H | 5.070182  | -1.556256 | -2.010556 |
| H | 6.180840  | 0.307689  | -3.168992 |
| H | 4.890544  | 1.422028  | -2.651312 |
| H | 3.390342  | -1.698728 | -3.929977 |
| H | -1.878133 | 2.050194  | -1.009056 |
| H | -2.459393 | 0.396299  | -0.470691 |
| H | -1.970253 | 1.284010  | -3.404873 |
| H | -1.909184 | -1.193982 | -3.835486 |
| H | -2.482997 | -1.494114 | -2.120494 |
| H | 3.992994  | 0.584673  | -0.297917 |
| H | 5.218544  | -0.257542 | 1.389792  |

**P'-sf**

|    |           |           |           |
|----|-----------|-----------|-----------|
| C  | 0.000000  | 0.000000  | 0.000000  |
| O  | 0.000000  | 0.000000  | 1.167405  |
| Mo | 0.041138  | 0.000000  | -1.982243 |
| C  | -2.030486 | -0.699870 | -2.830397 |
| C  | -2.007848 | 0.700189  | -2.603891 |
| C  | -1.916186 | 1.113530  | -1.253645 |
| N  | 0.563843  | 0.163615  | -4.157374 |
| C  | 1.058263  | 1.270390  | -4.599181 |
| C  | 1.073490  | 2.385782  | -3.644071 |
| N  | 0.655315  | 2.122917  | -2.450114 |
| C  | -0.142857 | -1.965435 | -1.731455 |
| O  | -0.253681 | -3.109689 | -1.555631 |
| O  | 2.175538  | -0.276863 | -1.816796 |
| C  | 2.924999  | -0.981651 | -2.603852 |
| C  | 4.435912  | -0.867325 | -2.325461 |
| C  | 5.053175  | 0.306035  | -3.132621 |
| N  | 4.773672  | 0.206515  | -4.569124 |
| S  | 4.380823  | 1.678252  | -5.381228 |
| O  | 3.575214  | 1.196673  | -6.541047 |
| O  | 2.542944  | -1.673728 | -3.557500 |
| N  | 4.660864  | -0.659215 | -0.898823 |
| C  | 5.662589  | -1.216190 | -0.180488 |

Supplementary Material (ESI) for *Dalton Transactions*  
This journal is © The Royal Society of Chemistry 2008

|   |           |           |           |
|---|-----------|-----------|-----------|
| O | 6.567893  | -1.920215 | -0.619244 |
| O | 5.663657  | 2.337526  | -5.694560 |
| O | 3.546228  | 2.491883  | -4.414293 |
| H | 0.718229  | 2.911538  | -1.809009 |
| H | 1.445372  | 3.356751  | -3.956117 |
| H | 1.519953  | 1.380671  | -5.580321 |
| H | 0.680744  | -0.628790 | -4.787024 |
| H | 4.910179  | -1.807114 | -2.615799 |
| H | 6.135140  | 0.293927  | -2.957637 |
| H | 4.649504  | 1.241862  | -2.726461 |
| H | 4.033395  | -0.459010 | -4.782705 |
| H | -1.773980 | 2.166128  | -1.023519 |
| H | -2.438532 | 0.542498  | -0.490546 |
| H | -1.901934 | 1.405128  | -3.422759 |
| H | -1.977448 | -1.075983 | -3.848354 |
| H | -2.570521 | -1.335824 | -2.133363 |
| H | 3.927216  | -0.154258 | -0.415698 |
| H | 5.588398  | -0.963643 | 0.896342  |

---

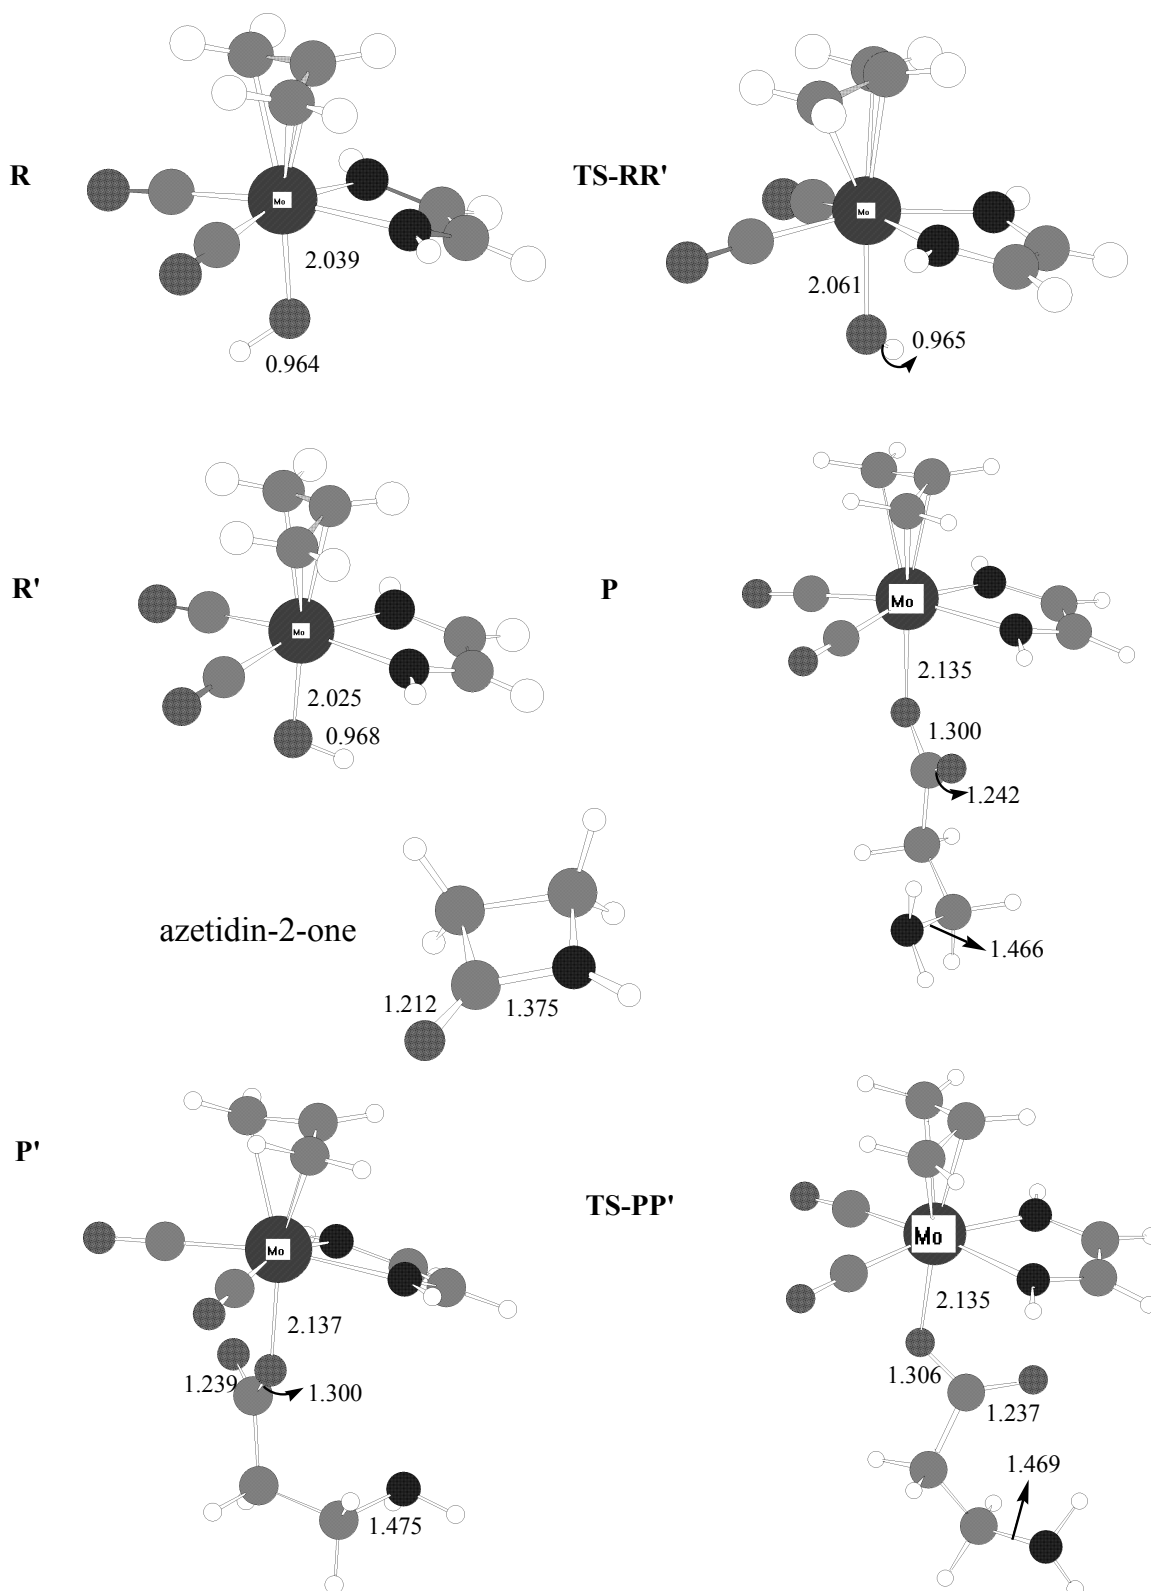

**Figure 1S.** B3LYP/6-31+G(d,p) (LANL2DZ for Mo augmented by f polarization functions with exponent 1.043) optimized geometries of azetidin-2-one, the **R** and **R'** conformers of  $[\text{Mo}(\text{OH})(\eta^3\text{-C}_3\text{H}_5)(\text{CO})_2(\text{N}_2\text{C}_2\text{H}_4)]$ , and the TS for their interconversion (**TS-RR'**) and the products **P** and **P'**, and the TS for their interconversion (**TS-PP'**). Only the most relevant distances are given in angstroms.

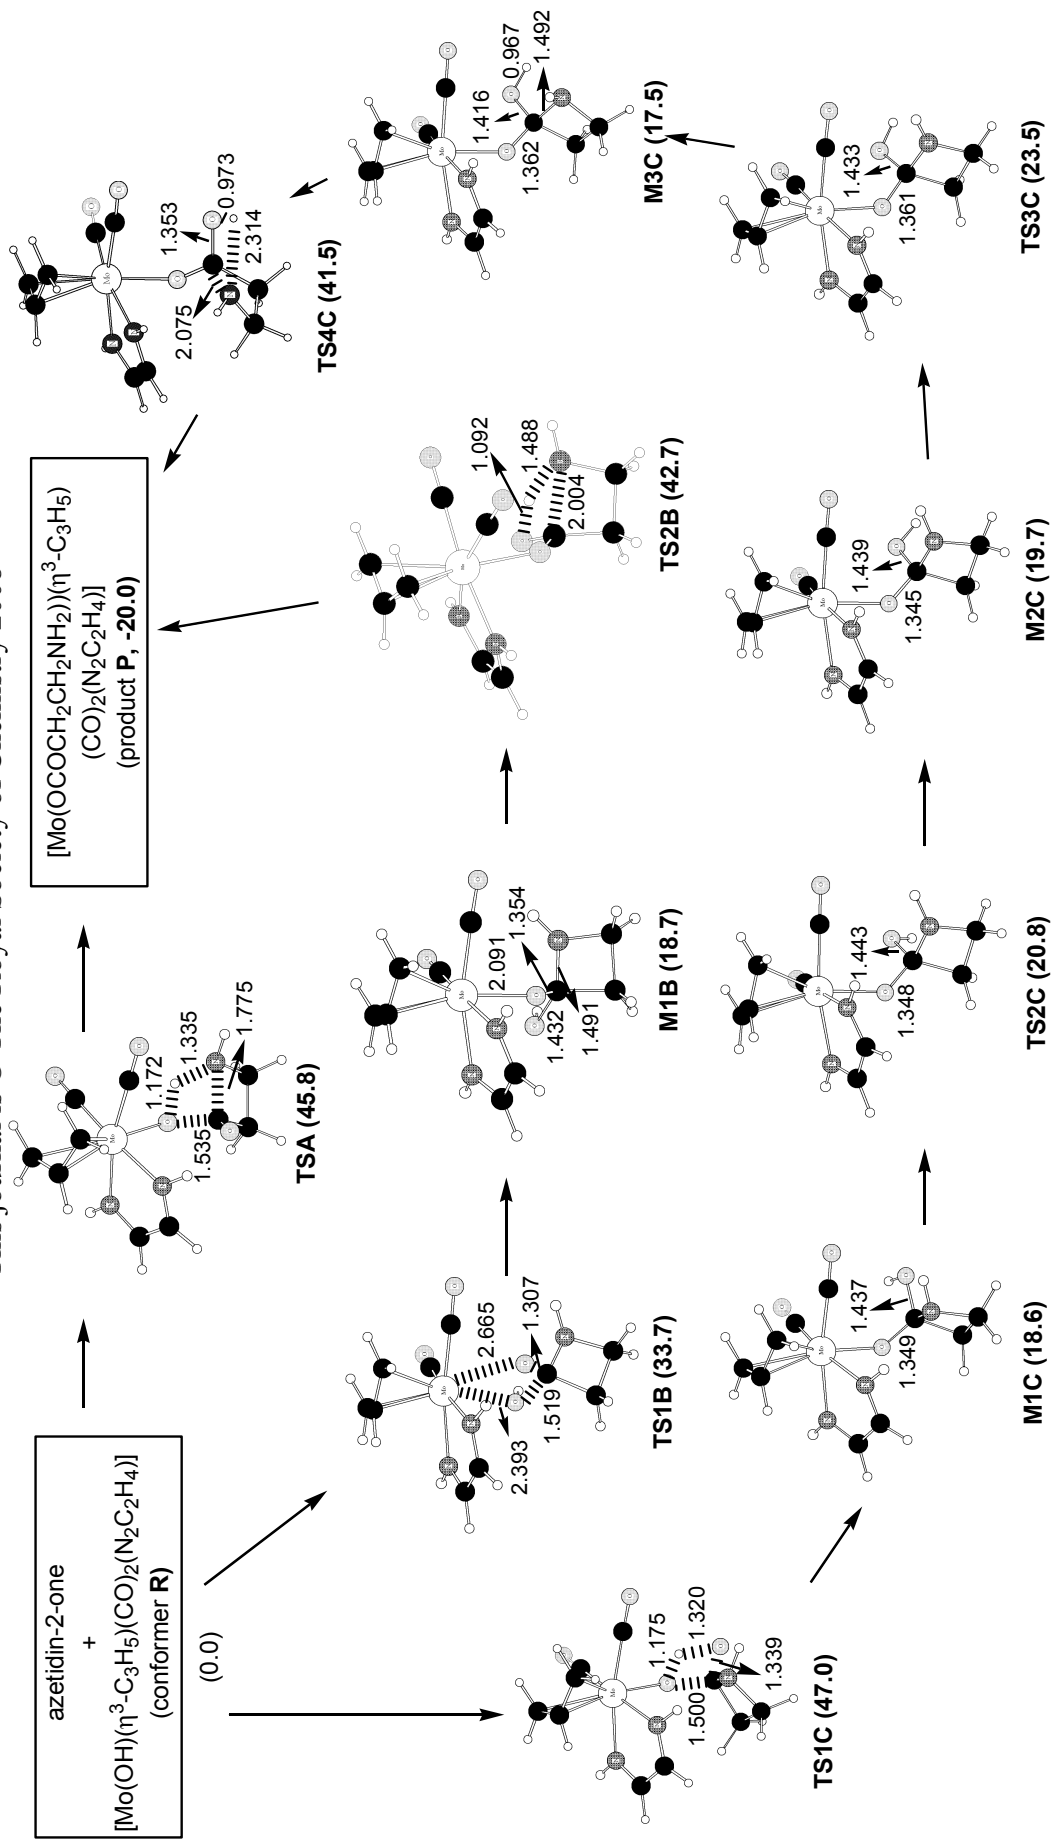

**Figure 2S.** Schematic view of the optimized structures involved in the reaction mechanisms found for the reaction between azetidin-2-one and the conformer **R** of  $[\text{Mo(OH)}(\eta^3\text{-C}_3\text{H}_5)(\text{CO})_2(\text{N}_2\text{C}_2\text{H}_4)]$ . Relative energies in solution in kcal mol<sup>-1</sup> and the most relevant distances in angstroms are also displayed.

Supplementary Material (ESI) for *Dalton Transactions*  
This journal is © The Royal Society of Chemistry 2008
